1           **Potent but transient immunosuppression of T-cells is a general feature of**  
2           **CD71<sup>+</sup> erythroid cells**

3           Tomasz M. Grzywa<sup>1,2,3</sup>, Anna Sosnowska<sup>1,4</sup>, Zuzanna Rydzynska<sup>1</sup>, Michal  
4           Lazniewski<sup>5,6</sup>, Dariusz Plewczynski<sup>5,7</sup>, Klaudia Klicka<sup>2,8</sup>, Milena Malecka-Gieldowska<sup>9</sup>,  
5           Anna Rodziewicz-Lurzynska<sup>10</sup>, Olga Ciepiela<sup>9</sup>, Magdalena Justyniarska<sup>1</sup>, Paulina  
6           Pomper<sup>11</sup>, Marcin M. Grzybowski<sup>11</sup>, Roman Blaszczyk<sup>11</sup>, Michal Wegrzynowicz<sup>12</sup>,  
7           Agnieszka Tomaszewska<sup>13</sup>, Grzegorz Basak<sup>13</sup>, Jakub Golab<sup>1,14\*</sup>, Dominika Nowis<sup>1,3\*</sup>  
8

9  
10          <sup>1</sup>Department of Immunology, Medical University of Warsaw, Warsaw, Poland

11          <sup>2</sup>Doctoral School of the Medical University of Warsaw, Warsaw, Poland

12          <sup>3</sup>Laboratory of Experimental Medicine, Medical University of Warsaw, Warsaw,  
13          Poland

14          <sup>4</sup>Postgraduate School of Molecular Medicine, Medical University of Warsaw, Warsaw,  
15          Poland

16          <sup>5</sup>Laboratory of Functional and Structural Genomics, Centre of New Technologies,  
17          University of Warsaw, Warsaw, Poland

18          <sup>6</sup>Centre for Advanced Materials and Technologies, Warsaw University of Technology,  
19          Warsaw, Poland

20          <sup>7</sup>Faculty of Mathematics and Information Science, Warsaw University of Technology,  
21          Warsaw, Poland

22          <sup>8</sup>Department of Methodology, Medical University of Warsaw, Warsaw, Poland

23          <sup>9</sup>Department of Laboratory Medicine, Medical University of Warsaw, Warsaw, Poland

24          <sup>10</sup>Central Laboratory, University Clinical Center of Medical University of Warsaw,  
25          Warsaw, Poland

26          <sup>11</sup>OncoArendi Therapeutics, Warsaw, Poland

27          <sup>12</sup>Laboratory of Molecular Basis of Neurodegeneration, Mossakowski Medical  
28          Research Institute, Polish Academy of Sciences, Warsaw, Poland

29          <sup>13</sup>Department of Hematology, Transplantation and Internal Medicine, Medical  
30          University of Warsaw, Warsaw, Poland

31          <sup>14</sup>Centre of Preclinical Research, Medical University of Warsaw, Warsaw, Poland  
32

33          **Keywords:** CD71<sup>+</sup> erythroid cells, erythroid progenitor cells, anemia, arginase,  
34          reactive oxygen species, immunosuppression, erythropoiesis, phenylhydrazine  
35

36          **Running title:** CECs and immunosuppression  
37

38          \*corresponding authors:

39          Jakub Golab, M.D., Ph.D.

40          e-mail: [jakub.golab@wum.edu.pl](mailto:jakub.golab@wum.edu.pl)  
41

42          Dominika Nowis, M.D., Ph.D.

43          e-mail: [dominika.nowis@wum.edu.pl](mailto:dominika.nowis@wum.edu.pl)  
44

45          Department of Immunology  
46          Medical University of Warsaw  
47          5 Nielubowicza Str.  
48          02-097 Warsaw, Poland  
49          Phone: +48-5992199

50 **Abstract**

51 CD71<sup>+</sup> erythroid cells (CECs) have been  
52 recently recognized in both neonates and  
53 cancer patients as potent  
54 immunoregulatory cells. Here, we show  
55 that in mice early-stage CECs expand in  
56 anemia, have high levels of arginase 2  
57 (ARG2) and reactive oxygen species

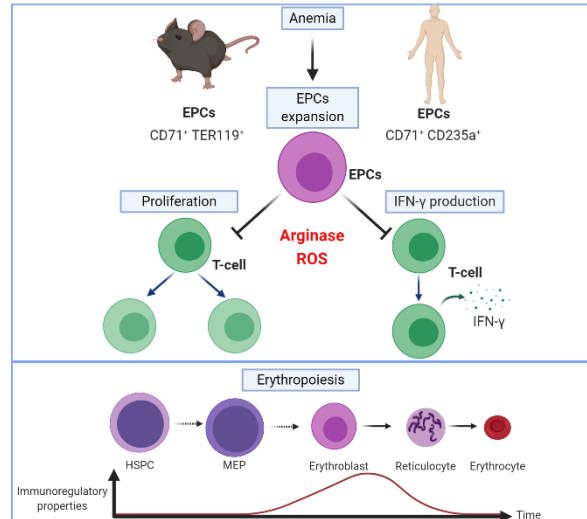

58 (ROS). In the spleens of anemic mice, CECs expansion-induced L-arginine depletion  
59 suppresses T-cell responses. In humans with anemia, CECs expand and express  
60 ARG1 and ARG2 that suppress T-cells IFN-γ production. Moreover, bone marrow  
61 CECs from healthy human donors suppress T-cells proliferation. CECs differentiated  
62 from peripheral blood mononuclear cells potently suppress T-cell activation,  
63 proliferation, and IFN-γ production in an ARG- and ROS-dependent manner. These  
64 effects are the most prominent for early-stage CECs (CD71<sup>high</sup>CD235a<sup>dim</sup> cells). The  
65 suppressive properties disappear during erythroid differentiation as more  
66 differentiated CECs and mature erythrocytes lack significant immunoregulatory  
67 properties. Our studies provide a novel insight into the role of CECs in the immune  
68 response regulation.

## 69 **Introduction**

70 CD71<sup>+</sup> erythroid cells (CECs) normally reside in the bone marrow and are progenitors  
71 and precursors to over  $2 \times 10^{11}$  of oxygen-transporting red blood cells (RBCs)  
72 generated per day<sup>1</sup>. In mice, when steady-state erythropoiesis becomes insufficient  
73 to meet increased tissue oxygen demands, CECs are released from the bone marrow  
74 to the circulation and expand in the extramedullary hematopoietic sites. In humans,  
75 increased RBCs damage or loss of blood is compensated by increased erythropoietic  
76 activity in the bone marrow. Recent studies revealed an unexpected complexity of  
77 CECs functions. CECs arose as a relevant population of cells regulating immunity<sup>2-5</sup>.  
78 Initially, CECs were reported to suppress both innate and humoral immune  
79 responses in neonates<sup>4,6,7</sup> and it was suggested that their immunomodulatory  
80 functions are restricted to early life events<sup>4</sup>. However, further studies revealed a  
81 crucial role of CECs in the regulation of multiple phenomena such as fetomaternal  
82 tolerance<sup>8</sup>, immune response in cancer patients<sup>9,10</sup>, systemic inflammation in colitis<sup>11</sup>,  
83 and anti-viral response in human immunodeficiency virus (HIV) infection<sup>12</sup>, as well as  
84 SARS-CoV-2-induced disease (COVID-19)<sup>13</sup>. It has been reported that CD45<sup>+</sup> CECs  
85 induced by advanced tumors inhibit CD8<sup>+</sup> and CD4<sup>+</sup> T-cell proliferation and impair  
86 antimicrobial immunity<sup>10</sup>. Interestingly, the authors demonstrated that CECs from  
87 mice with acute hemolytic anemia, induced by systemic phenylhydrazine (PHZ)  
88 administration, are not immunosuppressive as compared with CECs from tumor-  
89 bearing mice<sup>10</sup>. This could lead to the conclusion that only CECs in newborns and  
90 patients with advanced cancer have robust immunosuppressive properties. In this  
91 study, we provide evidence that CECs in anemic mice do have immunoregulatory  
92 properties, but PHZ used to induce hemolysis affects the mechanisms of immune  
93 suppression used by these cells masking their phenotype. Moreover, we

94 comprehensively elucidate the role of CECs in the regulation of immune response in  
95 both mice and humans and demonstrate that immunomodulatory properties of CECs  
96 are robust but transient and disappear during their maturation.

## 97 **Results**

### 98 **Early-stage CECs expand in the spleens of anemic mice**

99 We initially compared the expansion of CECs in 3 days old neonatal and adult  
100 anemic mice (Fig. 1a). Non-hemolytic anemia (NHA) was induced by phlebotomy and  
101 hemolytic anemia (HA) was induced either by administration of PHZ (HA-PHZ) or  
102 anti-TER119 antibodies (HA-TER119) (see Supplementary Fig. 1 for hematological  
103 parameters of these mice). Since in mice stress erythropoiesis rely on the  
104 erythropoietic activity of the spleen<sup>14,15</sup>, we assessed CECs expansion in this organ.  
105 CECs expanded in the spleens of anemic mice as compared with controls but were  
106 significantly less frequent than in neonatal mice (Fig. 1b). However, CECs numbers  
107 in the spleen were substantially higher in anemic mice than in neonates or controls  
108 (Fig. 1c). The percentage of CECs increased also in the blood of anemic mice  
109 (Supplementary Fig. 2a) but remained unchanged in the bone marrow  
110 (Supplementary Fig. 2b). Recent studies indicated that CECs at the earliest stages of  
111 differentiation express CD45 and more potently suppress immune response<sup>9,10</sup>. The  
112 proportion of CD45<sup>+</sup> to CD45<sup>-</sup> CECs was the highest in HA-PHZ mice and the lowest  
113 in neonatal mice (Fig. 1d). Analysis of developmental stages of CECs based on cell  
114 size and CD44 levels (Fig. 1e)<sup>16</sup> revealed enrichment of less differentiated CECs in  
115 anemic mice compared to non-anemic controls (Fig. 1f, Supplementary Fig. 2c).  
116 These early-stage CECs expressed CD45 (Fig. 1g,h) and were predominantly  
117 erythroid progenitors before enucleation (Fig. 1i).

118

## 119 **The T-cell immune response is impaired in anemic mice**

120 Next, we sought to determine whether the expansion of early-stage CECs induced by  
121 anemia might impair the function of the immune system. To this end, we assessed  
122 selected functionalities of myeloid cells, B-cells, and T-cells in control and anemic  
123 mice. In contrast to neonatal mice<sup>4,6</sup>, production of TNF- $\alpha$  by splenic CD11b<sup>+</sup> cells  
124 after stimulation with heat-killed *E. coli* (HKEc) (Supplementary Fig. 3a,b) or the  
125 concentration of anti-ovalbumin (OVA) IgG antibodies after OVA-ALUM immunization  
126 (Supplementary Fig. 3c,d) was unimpaired in adult anemic mice as compared with  
127 healthy controls. Intriguingly, we found that the proliferation of adoptively transferred  
128 SIINFEKL-specific OT-I T-cells in response to OVA stimulation was decreased in the  
129 spleen of NHA mice compared to healthy controls (Fig. 2a,b).

130 Since the expansion of CD71<sup>+</sup> cells was the most substantial in the spleens of  
131 anemic mice (Supplementary Fig. 3e) and the ratio of CECs number to T-cells  
132 number was significantly increased in anemia (Supplementary Fig. 3f,g), we  
133 hypothesized that CECs might be responsible for T-cells suppression. Indeed, CECs  
134 isolated from the spleens of both HA and NHA anemic mice (Fig. 2c, Supplementary  
135 Fig. 4a) suppressed the proliferation of CD4<sup>+</sup> T-cells that were activated with anti-  
136 CD3/CD28 beads (Fig. 2d). Altogether, these data document a rather selective  
137 impairment of T-cell response by CECs in anemic mice.

138

## 139 **Murine CECs have high ROS levels and express ARG2**

140 Both ROS generation and expression of L-Arg-degrading enzymes were previously  
141 identified as the effectors of the immunoregulatory activity of neonatal CECs<sup>4,17</sup>.

142 Accordingly, we found that both cytoplasmic and nuclear ROS levels were higher in  
143 anemia-induced CECs as compared with mature RBCs (Fig. 3a, Supplementary Fig.  
144 5a,b). ROS reached the highest values in the CECs at the earliest stages of their  
145 maturation (Supplementary Fig. 5c,d) i.e. in CD45<sup>+</sup> CECs (Supplementary Fig. 5e,f).  
146 Interestingly, in contrast to human CECs<sup>13</sup>, ROS levels in murine CECs, including  
147 CD45<sup>+</sup> CECs, were significantly lower than in the cells of non-erythroid lineages such  
148 as myeloid cells or T-cells (Fig. 3b).

149 Murine CECs expressed ARG2, a mitochondrial arginase isoform (Fig. 3c,d), but had  
150 almost undetectable cytosolic ARG1 based on intracellular staining (Fig. 3e) as well  
151 as enhanced Yellow Fluorescent Protein (eYFP) signal in reporter B6.129S4-  
152 Arg1<sup>tm1Lky</sup>/J mice that express eYFP under *Arg1* promoter (Fig. 3f,g). Similar to ROS,  
153 the levels of ARG1 and ARG2 were the highest in early-stage CECs and  
154 consequently decreased during maturation (Supplementary Fig. 6a-g). Intriguingly,  
155 while the level of ARG2 (Fig. 3c), as well as the percentage of ARG2<sup>+</sup> CECs, were  
156 similar in all groups (Fig. 3d), the fraction of ARG1<sup>+</sup> cells was substantially higher in  
157 HA-PHZ mice as determined by intracellular staining (Fig. 3e). This finding seems  
158 counterintuitive considering that ARG-dependent degradation of L-arginine leads to  
159 T-cell suppression<sup>18,19</sup>, and we did not observe the suppression of T-cells in HA-PHZ  
160 mice *in vivo* (Fig. 2b). Moreover, CECs from HA-PHZ mice exerted the weakest  
161 suppressive effects on T-cells proliferation (Fig. 2d). Increased expression of ARG1  
162 in HA-PHZ CECs was further confirmed by ARG1 mRNA detection (Supplementary  
163 Fig. 7a) and in reporter B6.129S4-Arg1<sup>tm1Lky</sup>/J mice (Fig. 3g,h) indicating that flow  
164 cytometry findings were not artifactual. HA-PHZ CECs had increased expression of  
165 ARG2 mRNA as compared with NHA CECs (Supplementary Fig. 7b), but no increase  
166 in ARG2 protein levels was observed (Fig. 3d). Surprisingly, despite robust

167 upregulation of ARG1 levels, total arginase activity in both CECs isolated from HA-  
168 PHZ mice and CECs-conditioned medium was lower even than that in CECs from  
169 NHA mice (Fig. 3i,j). Moreover, CECs cultured *ex vivo* in the presence of PHZ  
170 strongly upregulated ARG1 expression (Fig. 3k,l). Then, we sought to confirm  
171 whether PHZ is responsible for the attenuation of CECs immunoregulatory  
172 properties. Indeed, we found that CECs isolated from NHA lose their suppressive  
173 effects on T-cells proliferation in the presence of PHZ (Supplementary Fig. 8a,b).

174

### 175 **PHZ targets arginase and suppresses its activity**

176 Increased expression with a concomitant decrease in arginase activity suggested an  
177 interaction between PHZ and arginase. Further studies showed that indeed PHZ  
178 inhibits the activity of recombinant human ARG1 and ARG2, with an IC<sub>50</sub> of 1017 μM  
179 and 61 μM, respectively (Fig. 4a). However, PHZ did not affect the production of nitric  
180 oxide (NO) by nitric oxide synthase, which is also using L-arginine as a substrate  
181 (Fig. 4b). To elucidate how PHZ interacts with ARG1 and ARG2 a molecular docking  
182 simulation was carried out with PHZ, L-arginine as well as 2-amino-6-borono-2-(2-  
183 (piperidin-1-yl)ethyl)hexanoic acid (ABH) that is a strong ARG1 inhibitor<sup>20</sup>. PHZ binds  
184 to the active sites of all arginases, where it forms several polar interactions involving  
185 D128, D232, or T246 (Supplementary Fig. 9a). Thus, it may block the entry of other  
186 molecules to the active site. However, predicted binding energies suggest that  
187 among the tested ligands PHZ has the weakest affinity for arginases, and thus a  
188 significant concentration of this compound may be required to induce any biological  
189 effect, which indeed is the case *in vivo*. The transient nature of interactions between  
190 PHZ and arginases was also confirmed by a short 100 ns MD simulation  
191 (Supplementary Fig. 9b,c). The ligand remained bound to the active site for only 15-

192 30% of the simulation time, despite its initial placement inside the ligand-binding  
193 pocket. The analysis of electrostatic surface potential revealed the presence of a  
194 large, negatively charged area around the substrate-binding pocket of ARG1 that  
195 likely plays a role in attracting positively charged L-arginine to the catalytic site (Fig.  
196 4c). Since PHZ in the presence of oxygen leads to the formation of free radicals and  
197 hydrogen peroxide<sup>21</sup>, we hypothesized that decreased ARG activity in CECs from  
198 HA-PHZ mice might emerge due to non-specific non-covalent interactions of PHZ  
199 with the catalytic pocket of ARG1 that leads to oxidative changes in the enzyme,  
200 decreased activity, and compensatory increase in its expression. Indeed, the  
201 incubation of recombinant ARG1 with PHZ in the presence of oxygen led to a  
202 significant increase in the carbonylation of the enzyme. However, this effect was only  
203 slightly reduced by concomitant incubation with N-acetylcysteine (ROSi) (Fig. 4d).  
204 Moreover, ROS scavengers did not prevent ARG1 induction by PHZ *in vivo*  
205 (Supplementary Fig. 10a,b) nor *in vitro* (Supplementary Fig. 10c,d). Thus, we  
206 demonstrated that PHZ targets ARG leading to the diminishment of CECs  
207 immunoregulatory properties, however, the exact mechanism that would explain  
208 PHZ-mediated inhibition of ARG activity remains elusive.

209

## 210 **CECs degrade L-Arg and produce ROS leading to the suppression of T-cells**

211 Due to the interaction between PHZ and arginases, we chose NHA as a model of  
212 anemia-induced CECs for further studies. We found that CD4<sup>+</sup> T-cells stimulated with  
213 anti-CD3/CD28 beads in the presence of CECs showed downregulation of activation  
214 markers CD25 and CD69, which was less pronounced for CD62L (Fig. 5a). Both  
215 arginase inhibitor (ARGi, OAT-1746, a membrane-permeable, potent inhibitor of both  
216 arginase isoforms<sup>22-24</sup>) and ROS inhibitor (ROSi, N-acetylcysteine) nearly completely



217 restored the proliferation of T-cells that was inhibited by co-culture with CECs  
218 isolated from NHA mice (Fig. 5b), similar to CECs isolated from neonates  
219 (Supplementary Fig. 11). Likewise, CECs-conditioned medium had a suppressive  
220 effect on T-cell proliferation, and supplementation with either of L-arginine or ARGi  
221 restored T-cell proliferation to percentages akin to the control group (Fig. 5c).

222 To confirm that early-stage CECs that have the highest ROS levels (Supplementary  
223 Fig. 5) and ARG expression (Supplementary Fig. 6) have the most potent  
224 suppressive effects on T-cells, we isolated the fraction of nucleated cells (erythroid  
225 progenitors, developmental stages I-III, Fig. 1i) from CECs using density gradient  
226 centrifugation. We found that the whole CECs population suppressed CD4<sup>+</sup> T-cells  
227 proliferation by 43% while isolated nucleated CECs (nCECs) completely inhibited it  
228 (Fig. 5d), confirming that they are responsible for the suppressive effects.

229 At a 1:10 of T-cells to CECs ratio, similar to that observed in anemia (Supplementary  
230 Fig. 3f,g), CECs completely suppressed the proliferation of CD4<sup>+</sup> (Fig. 5e) and CD8<sup>+</sup>  
231 T-cells (Fig. 5f). Further studies revealed that the expansion of CECs in anemic mice  
232 leads to the substantial increase of the total arginase activity (Fig. 5g). This effect  
233 was caused by an increased ARG2 but not ARG1 levels in the spleen (Fig. 5h-j).  
234 Even though the concentration of L-arginine was only slightly decreased in the serum  
235 of anemic mice (Supplementary Fig. 12), their splenic CD4<sup>+</sup> T-cells and CD8<sup>+</sup> T-cells  
236 had decreased levels of CD3ζ (Fig. 5k,l), a marker of L-arginine T-cell starvation<sup>25,26</sup>.  
237 Accordingly, *ex vivo* stimulation of T-cells with anti-CD3/CD28 beads in the presence  
238 of CECs resulted in a decrease in CD3ζ, which was prevented by ARGi and  
239 completely restored by the combination of ARGi and ROSi (Fig. 5m,n). Noteworthy,  
240 the decrease in CD3ζ was not observed in the lymph nodes of anemic mice, where  
241 CECs are a relatively rare population (Supplementary Fig. 13a-c). Altogether, these

242 results show that CECs suppress T-cells response in anemic mice *via* both arginase  
243 and ROS and their local accumulation in the spleen impairs T-cell immunity.

244 To further study the role of ARG2 in the modulation of immune response by CECs,  
245 we assessed the suppressive effects of CECs isolated from anemic mice lacking  
246 functional *Arg2* gene (*Arg2*<sup>-/-</sup>, *Arg2*<sup>tm1W<sup>eo</sup>/J</sup> mice<sup>27</sup>). *Arg2*<sup>-/-</sup> mice had effective stress  
247 erythropoiesis (Supplementary Fig. 14a). Despite a slightly increased percentage of  
248 ARG1<sup>+</sup> CECs compared to wild-type mice (*Arg2*<sup>+/+</sup>) (Supplementary Fig. 14b), no  
249 significant changes in total ARG1 levels were observed in these cells (Supplementary  
250 Fig. 14c). In contrast to wild-type mice, expansion of CECs in the spleen of anemic  
251 *Arg2*<sup>-/-</sup> mice was not associated with a significant decrease in CD3ζ in T-cells (Fig.  
252 6a,b). Moreover, CECs isolated from *Arg2*<sup>-/-</sup> mice had substantially diminished  
253 suppressive effects on T-cell proliferation as compared with *Arg2*<sup>+/+</sup> CECs (Fig. 6c),  
254 confirming a critical role of ARG2 in the regulation of T-cells function by murine  
255 CECs.

256

### 257 **CECs expand in the blood of anemic individuals and suppress IFN-γ** 258 **production by T-cells**

259 Then, we sought to investigate the role of CECs in anemic patients (Supplementary  
260 Table 1, Supplementary Table 2). The percentages of CECs (CD71<sup>+</sup>CD235a<sup>+</sup>) in the  
261 peripheral blood were substantially increased in anemic patients compared to non-  
262 anemic control individuals (Fig. 7a,b). The number of CECs in the blood (Fig. 7c)  
263 reversely correlated with hemoglobin concentration (Fig. 7d) and was the highest in  
264 patients with moderate and severe anemia (Fig. 7e).

265 In anemic patients, CECs constituted a substantial fraction of peripheral blood  
266 mononuclear cells (PBMCs) (Fig. 7f,g) and were predominantly at the latest stages of  
267 differentiation with a very small percentage of CD45<sup>+</sup> CECs (Supplementary Fig.  
268 15a,b). We found that the production of IFN- $\gamma$  in response to CD3/CD28 stimulation  
269 was suppressed in T-cells from anemic individuals when compared to non-anemic  
270 controls (Fig. 7h, i). However, T-cells proliferation (Supplementary Fig. 15c,d) or the  
271 production of TNF- $\alpha$  by myeloid cells in response to killed bacteria (Supplementary  
272 Fig. 15e) were comparable in anemic patients and control individuals.

273

#### 274 **CECs from human bone marrow suppress T-cells proliferation**

275 Since the expansion of CECs in the peripheral blood of anemic individuals was not  
276 associated with the suppression of T-cells proliferation, we investigated the  
277 immunoregulatory properties of CECs from the healthy human bone marrow (Fig.  
278 8a). CECs in the bone marrow are enriched with early-stage CECs (Supplementary  
279 Fig. 16a,b) and are predominantly CD45<sup>+</sup> (Supplementary Fig. 16c,d). Similar to  
280 murine CECs, their counterparts in the human bone marrow express ARG2 (Fig. 8b-  
281 d). Importantly, human erythroid cells also express ARG1 (Fig. 8b-d). The expression  
282 of both ARG isoforms was higher in CD45<sup>+</sup> than in CD45<sup>-</sup> CECs (Supplementary Fig.  
283 16e,f). CECs isolated from human bone marrow (Supplementary Fig. 16g)  
284 significantly suppressed proliferation of both CD4<sup>+</sup> and CD8<sup>+</sup> T-cells (Fig. 8e,f).  
285 These effects were diminished by the ARGi, confirming arginase-dependent effects  
286 of human CECs.

287

288 **Erythroleukemia-derived erythroid cell lines suppress T-cells in an ARG- and**  
289 **ROS-dependent mechanism**

290 Further, we investigated the immunoregulatory properties of model human  
291 erythroleukemia-derived erythroid cell lines: K562, HEL92.1.7, and TF-I. These cells  
292 express multiple erythroid-lineage markers, including CD71 and CD235a (Fig. 9a),  
293 and spontaneously differentiate into erythroblast-like cells. We found that similarly to  
294 primary CECs, erythroid cells have substantial arginase activity (Supplementary Fig.  
295 17a), express both ARG1 (Supplementary Fig. 17b) and ARG2 (Supplementary Fig.  
296 17c), and have high ROS levels (Supplementary Fig. 17d). Notably, all examined  
297 types of erythroid cells potently suppressed proliferation of human CD4<sup>+</sup> (Fig. 9b-e)  
298 and CD8<sup>+</sup> (Fig. 9f-i) T-cells in an ARG- and ROS-dependent manner (Fig. 9e,i,  
299 Supplementary Fig. 18a,b).

300

301 **Suppression of T-cells function is a general feature of erythroid cells which**  
302 **disappears during their maturation**

303 Our results demonstrated that T-cell suppression is a common feature of both murine  
304 and human CECs. Apparently the immunoregulatory properties were the most potent  
305 at the earliest stages of differentiation when the levels of ROS, ARG1, and ARG2 are  
306 the highest. Therefore, we next sought to establish a model of *ex vivo* differentiation  
307 of erythroid cells. To this end, CECs were expanded and differentiated from PBMCs  
308 of healthy human donors (Supplementary Fig. 19a). PBMC-derived CECs expressed  
309 erythroid markers, including CD71, CD235a, CD36, and CD49d, and had high  
310 expression of CD44 and CD45 (Supplementary Fig. 19a,b). Similar to their bone  
311 marrow counterparts, PBMCs-derived CECs had high levels of both ARG1 and

312 ARG2 (Supplementary Fig. 20a,b). Moreover, isolated PBMC-derived CECs (Fig.  
313 10a) potently suppressed both CD4<sup>+</sup> and CD8<sup>+</sup> human T-cell proliferation (Fig.  
314 10b,c).

315 Next, we aimed to study the possible changes in immunoregulatory properties of  
316 erythroid cells during differentiation into RBC. First, we investigated whether  
317 hematopoietic stem and progenitor cells (HSPCs) exert immunosuppressive effects.  
318 Mobilized hematopoietic stem cells obtained from peripheral blood (peripheral blood  
319 stem cells, PBSCs, Supplementary Fig. 21a) had high ARG1 and ARG2 levels  
320 (Supplementary Fig. 21b) and included only a small percentage of CECs  
321 (Supplementary Fig. 21c). Despite high arginase expression, peripheral blood stem  
322 cells had no impact on T-cell proliferation (Supplementary Fig. 21d,e).

323 Then, using continuous CECs culture, we demonstrated that CECs differentiated  
324 from PBMCs (Fig. 10d) exert robust, but transient suppressive properties, that  
325 disappear during erythroid differentiation (Fig. 10e-g). We found that of all CECs  
326 developmental stages, cells at the stage of CD71<sup>high</sup> CD235a<sup>mid</sup> most strongly  
327 inhibited T-cells proliferation (Fig. 10f,g). Moreover, these cells potently suppressed  
328 T-cells activation based on the CD25 and CD69 levels (Supplementary Fig. 22a,b) as  
329 well as inhibited IFN- $\gamma$  production by T-cells (Supplementary Fig. 22c). The  
330 suppression depended on both ARG and ROS since only the combination of ARGi  
331 and ROSi significantly diminished suppressed T-cell activation, IFN- $\gamma$  production  
332 (Supplementary Fig. 22c), and proliferation (Supplementary Fig. 23a,b). Loss of the  
333 suppressive properties corresponded with a decrease in CD71 (Fig. 10h), an  
334 increase in CD235a (Fig. 10i) as well as a decrease in CD49d (Fig. 10k) levels, the  
335 latter being a marker of the transition to the reticulocyte stage<sup>28,29</sup>. Subsequent CECs  
336 differentiation resulted in a complete loss of suppressive effects on T-cells.

337 Further, we observed that induction of erythroid differentiation of K562 cells by  
338 sodium butyrate<sup>30</sup> (Supplementary Fig. 24a) was associated with a decrease of  
339 immunosuppressive effects on T-cells (Supplementary Fig. 24b). These differentiated  
340 cells had decreased ARG2, but not ARG1 levels (Supplementary Fig. 24c), and  
341 decreased total arginase activity as compared with non-differentiated K562 cells  
342 (Supplementary Fig. 24d). Downregulation of ARG2 was most probably caused by  
343 mitophagy, a crucial process during erythroid differentiation<sup>31</sup>, as evidenced by the  
344 decreased signal from a mitochondrial probe in differentiated K562-erythroid cells  
345 (Supplementary Fig. 24e). Similar changes in ARG expression were also detected in  
346 primary murine (Supplementary Figure 6b-e) and human CECs (Supplementary  
347 Figure 20b). Finally, we demonstrated that mature RBCs obtained from healthy  
348 donors had no impact on T-cell proliferation (Supplementary Fig. 25a-c). Altogether,  
349 we show that human CECs possess robust, but transient suppressive properties that  
350 are most potent in the earliest developmental stages and disappear during erythroid  
351 cell maturation.

352

## 353 **Discussion**

354 In this study, we demonstrate that suppression of T-cells is a general feature of  
355 murine and human CECs. Anemic CECs *via* arginases and ROS suppress  
356 proliferation and production of IFN- $\gamma$  by T-cells. Using continuous human erythroid  
357 cell culture, we show that the immunoregulatory properties of CECs are transient and  
358 disappear during maturation.

359 Recent studies have broadened our understanding of the many roles played  
360 by CECs expanded by different triggers<sup>3</sup>. Immunoregulatory functions of CECs were

361 reported for the first time in neonates that are characterized by a physiological  
362 abundance of CECs<sup>4</sup>. Neonatal CECs suppress anti-bacterial immunity *via* ARG2 by  
363 decreasing the production of proinflammatory cytokines by myeloid cells<sup>4</sup> and by  
364 suppressing antibody production in response to *B. pertussis*<sup>6</sup>. We found that in adult  
365 mice anemia induced the expansion of early-stage CECs that had the highest  
366 expression of ARG2. Neither ARG2-expressing CECs nor recombinant ARG1  
367 suppressed the production of TNF- $\alpha$  from myeloid cells. However, arginases seem to  
368 primarily impair T-cells by decreasing their activation and proliferation<sup>32</sup>. Accordingly,  
369 we observed decreased proliferation of adoptively transferred OT-I cells in the spleen  
370 of anemic mice, which was reflected *ex vivo* in the co-culture of murine T-cells with  
371 CECs. Expansion of CECs in the spleen of anemic mice resulted in the increased  
372 ARG activity in the spleen leading to the L-arginine starvation of T-cells, decreased  
373 levels of CD3 $\zeta$ , and suppressed proliferation. Moreover, human CECs expressed  
374 both ARG1 and ARG2 and suppressed T-cell proliferation in an ARG-dependent  
375 manner. Thus, expansion of ARG-expressing CECs in anemia may induce immune  
376 suppression, similar to the expansion of ARG-expressing myeloid cells in cancer<sup>33</sup>  
377 and during pregnancy<sup>34</sup>.

378 CECs were also reported to modulate immune response *via* ROS in tumor-  
379 bearing mice and cancer patients<sup>10</sup>. We found that ROSi restored T-cell proliferation  
380 in co-culture with CECs from anemic mice to a similar extent as ARGi. Importantly,  
381 ROS also may decrease CD3 $\zeta$  in T-cells<sup>35</sup>. However, ROSi restored CD3 $\zeta$  decreased  
382 by CECs only in combination with ARGi, which confirms that ARG cooperates with  
383 ROS in CECs to induce T-cells hyporesponsiveness to proliferative triggers.

384 Importantly, we demonstrated that previously described lack of  
385 immunosuppressive capacities of CECs in anemic mice<sup>10</sup> resulted from the

386 interaction between PHZ used to induced anemia and ARGs. PHZ-induced hemolytic  
387 anemia is one of the most commonly used models of anemia. PHZ leads to the  
388 formation of ferrihemoglobin from oxyhemoglobin and production of free radicals that  
389 disrupt the interactions between hem and globin chains leading to the formation of  
390 Heinz bodies and hemolysis<sup>21</sup>. However, PHZ-induced CECs are less effective in  
391 suppressing T-cell proliferation as compared with CECs isolated from neonatal or  
392 other anemic mice. We show that PHZ targets ARGs, critical immunomodulating  
393 enzymes. It needs to be considered in future studies that the interaction between  
394 PHZ and ARGs may have considerable effects on the obtained results.

395 Anemia correlates with worse outcomes in many diseases, including  
396 pneumonia<sup>36</sup> or cancer<sup>37</sup>. Moreover, preoperative anemia is associated with an  
397 increased risk of infection and mortality in patients undergoing surgery<sup>38,39</sup>. We  
398 demonstrated that CECs expand in anemic patients and may suppress the  
399 production of cytokines by T-cells. A small fraction of CD45<sup>+</sup> CECs in the peripheral  
400 blood of our cohort subject is consistent with a recent report on CECs in systemic  
401 juvenile idiopathic arthritis patients<sup>40</sup>. In line with our results, a recent study showed  
402 that anemia status influences the blood transcriptome with enrichment of erythrocyte  
403 differentiation genes as well as ARG1 in anemic children, but decreased signatures  
404 of CD4<sup>+</sup> T-cell activation and differentiation<sup>41</sup>. It remains unknown to which extent  
405 CECs are responsible for immune suppression and whether in these conditions  
406 supplementation of iron, vitamin B12, or administration of erythropoiesis-stimulating  
407 agents including EPO may restore immune response.

408 Erythropoiesis is a continuum of developmental states that gives mature red  
409 blood cells from a hematopoietic stem cell (HSC) and is strictly regulated by multiple  
410 factors<sup>42</sup>. Recent studies demonstrated that immunomodulatory properties are strong



411 in early-stage CD45<sup>+</sup> CECs in contrast to more mature CD45<sup>-</sup> CECs that lack these  
412 capacities<sup>9,10,17,43</sup>. However, other studies also reported the immunomodulatory role  
413 of CD45<sup>-</sup> CECs<sup>40,44</sup>, which suggests that CD45 alone may not be a reliable marker of  
414 immunosuppressive CECs. Here, we showed that human CECs acquire  
415 immunomodulatory properties during erythroid differentiation and are the most potent  
416 in an early stage characterized by the CD71<sup>high</sup> CD235a<sup>mid</sup> phenotype. Further  
417 erythroid maturation is associated with the disappearance of the suppressive  
418 properties. These early-stage CECs are relatively rare in the peripheral blood of  
419 anemic individuals, which may be a reason for the lack of T-cell proliferation  
420 suppression. In contrast, human bone marrow is enriched in early-stage CECs that  
421 suppress T-cells proliferation. Nonetheless, the suppression of T-cells by bone  
422 marrow CECs was substantially weaker than that of CD71<sup>high</sup> CD235a<sup>mid</sup> CECs from  
423 *ex vivo* culture. This may be explained by the fact that in human bone marrow CECs  
424 at the earliest stages of differentiation are still much less abundant than late-stage  
425 CECs<sup>28,45</sup>.

426 The exact role of transient immunomodulatory properties of CECs remains  
427 elusive. It was suggested that expansion of CECs in neonates provides tolerance to  
428 harmless antigens, including the commensal microbiota<sup>4</sup>, and minimize damage  
429 caused by inflammation in the intestines<sup>4</sup>, liver<sup>7</sup>, and lungs<sup>46</sup> during the first days of  
430 postnatal life. In adults, the role of CECs seems to be similar. Recent studies  
431 demonstrated that stress erythropoiesis is a key inflammatory response<sup>47</sup>, therefore,  
432 expansion of CECs may prevent progression to chronic inflammation. Indeed,  
433 transfer of CECs suppressed inflammatory response and attenuated the wasting  
434 syndrome in murine models of colitis<sup>11</sup>. In cancer, which is characterized by a chronic  
435 inflammation<sup>48</sup>, CECs substantially expand and suppress immune response

436 facilitating tumor growth and increasing the susceptibility to pathogens<sup>10</sup>. On the  
437 other hand, impaired immunoregulatory properties of CECs may exacerbate the  
438 damage caused by inflammation<sup>49</sup>. Moreover, CECs by suppressing production of  
439 IFN- $\gamma$ , a crucial inflammatory cytokine and a potent inhibitor of erythropoiesis<sup>50,51</sup>,  
440 may allow maintenance of erythropoiesis and play a role in preventing systemic  
441 inflammation.

442         Importantly, most of the knowledge on CECs has been build based on murine  
443 models<sup>5</sup>. However, several crucial divergences between mice and humans may limit  
444 the translational character of CECs studies in mice, that include differences in stress  
445 erythropoiesis<sup>52</sup>. In mice, stress erythropoiesis primarily takes place in the spleen and  
446 relies on the expansion of early-stage CECs<sup>53</sup>. Thus, suppressive CECs may interact  
447 with immune cells in the spleen, which is also an active immune organ<sup>54</sup>. We  
448 observed that T-cells in anemic mice are rather locally suppressed in the spleen,  
449 while not affected in the lymph nodes, similar to the conditions described for  
450 neonates<sup>4</sup>. In contrast, in humans stress erythropoiesis primarily involves the bone  
451 marrow, and expansion of CECs in extramedullary sites is rather occasional<sup>5,52</sup>.  
452 Moreover, CECs at the earliest stages of differentiation are relatively rare in healthy  
453 individuals<sup>45</sup>. Thus, it seems that CECs may have the most significant  
454 immunoregulatory role under conditions that are characterized by the impaired  
455 erythroid differentiation and robust enrichment of early-stage CECs, that include  
456 cancer<sup>55</sup>.

457         Our findings might be of relevance in better understanding the mechanisms  
458 underlying suppressed cell-mediated immunity and anti-bactericidal capacity of  
459 leucocytes<sup>56</sup> and the impaired of T-cell mediated immunity in anemic children<sup>57</sup>.

460 Moreover, our study suggests that CECs may be a crucial regulator of immune  
461 response in different disease conditions.

462 **Methods**

463 **Reagents**

464 Recombinant human ARG1 was obtained from Biolegend (San Diego, CA, USA),  
465 recombinant murine Arg1 was obtained from Cloud-Clone Corp., arginase inhibitor  
466 OAT-1746 was synthesized at OncoArendi Therapeutics, Warsaw, Poland. All other  
467 reagents, if not otherwise stated, were obtained from SigmaAldrich.

468

469 **Cell lines**

470 K562, HEL92.1.7 and TF-I cell lines were purchased from American Type Culture  
471 Collection (ATCC). Cells were cultured in RPMI-1640 medium supplemented with  
472 10% heat-inactivated fetal bovine serum (FBS, HyClone), 2 mM L-glutamine  
473 (SigmaAldrich) 100 U/ml penicillin and 100 µg/ml streptomycin (SigmaAldrich) at  
474 37°C in a humidified atmosphere of 5% CO<sub>2</sub> in the air. Additionally, TF-I cells medium  
475 contained 2 ng/ml of recombinant human GM-CSF (R&D Systems). Cells have been  
476 cultured for no longer than 4 weeks after thawing and were regularly tested for  
477 *Mycoplasma* contamination using PCR technique and were confirmed to be negative.

478

479 **Human samples**

480 Human PBMCs used as a source of CD4<sup>+</sup> and CD8<sup>+</sup> T-cells and used for the  
481 expansion and differentiation of PBMC-derived CECs were isolated from buffy coats  
482 obtained commercially from the Regional Blood Centre in Warsaw, Poland. PBMCs  
483 were isolated by density gradient centrifugation method using Histopaque<sup>®</sup>-1077  
484 (SigmaAldrich) or Lymphoprep<sup>™</sup> (STEMCELL Technologies), according to the  
485 manufacturer's protocols. All donors were males between the ages of 18 and 45  
486 years old. Donors were screened for general health and qualified by the physician for

487 blood donation. All donors had negative clinical laboratory tests for HIV-1, HIV2,  
488 hepatitis B, and hepatitis C and hematology values within normal ranges.

489       Peripheral blood samples were obtained from patients hospitalized in the  
490 Central Teaching Clinical Hospital, Medical University of Warsaw or treated in the  
491 Outpatient Clinic of Central Teaching Clinical Hospital, Medical University of Warsaw,  
492 Warsaw. The study was conducted in accordance with the Declaration of Helsinki.  
493 The study was approved by the Bioethical Committee of the Medical University of  
494 Warsaw (KB/8/2021). Patients with or without anemia based on WHO diagnostic  
495 criteria<sup>58</sup> were enrolled in the study. Patients with proliferative diseases, including  
496 cancer, were excluded. The blood samples were obtained by venipuncture and  
497 subjected to complete blood count evaluation. The remaining blood was used for  
498 further examination. Flow cytometry was performed as described below.  
499 CountBright™ Absolute Counting Beads (Thermo Fisher Scientific) were used for  
500 CECs counting. PBMCs were purified from whole blood of anemic and non-anemic  
501 patients by density separation using Lymphoprep (STEMCELL Technologies).

502       Human bone marrow samples were commercially obtained from Lonza  
503 Walkersville, Inc. Aspirates were withdrawn from bilateral punctures of the posterior  
504 iliac crests. Every 100 ml of bone marrow was collected into syringes containing 10  
505 ml of heparin (Porcine Intestinal Mucosa) Sodium Injection (~100 units heparin per ml  
506 bone marrow). Bone marrow samples were obtained from both healthy males (n=6)  
507 and healthy non-pregnant females (n=3) US-based donors between the ages of 23  
508 and 45 years old. Samples were collected after obtaining permission for their use in  
509 research applications by informed consent or legal authorization. All donors were  
510 screened for general health and negative medical history for heart disease, kidney

511 disease, liver disease, cancer, epilepsy, and blood or bleeding disorders. All donors  
512 had negative clinical laboratory tests for HIV-1, HIV2, hepatitis B, and hepatitis C.

513 Mobilized peripheral blood stem cells (PBSCs) were obtained from familial  
514 donors from the material remaining after allogeneic stem cell transplantation. PBSCs  
515 were mobilized with the granulocyte colony-stimulating factor (G-CSF) and isolated  
516 from the donor peripheral blood using apheresis according to the standard clinical  
517 protocol. Informed consent was obtained from PBSCs donors. Collected PBSCs were  
518 subjected to density gradient centrifugation using Lymphoprep (STEMCELL  
519 Technologies) to remove dead cells and debris, washed three times with RPMI  
520 medium, and used for the analysis.

521

## 522 **Mice**

523 Wild-type C57BL/6 mice, both male and female, 8 to 14-week-old were obtained from  
524 the Animal House of the Polish Academy of Sciences, Medical Research Institute  
525 (Warsaw, Poland). Transgenic mice of C57BL/6 genetic background, B6.129S4-  
526  $Arg1^{tm1Lky}/J$  (YARG Mice co-expressing Arg1 and enhanced yellow fluorescent  
527 protein (eYFP)<sup>59</sup>, stock #015857), C57BL/6-Tg(TcraTcrb) 1100Mjb/J (OT-I, TCR  
528 transgenic mice producing OVA peptide-specific CD8<sup>+</sup> T cells<sup>60</sup>, stock #003831) and  
529  $Arg2^{tm1Weo}/J$  ( $Arg2^{-/-}$ , Arg2 functional knockout<sup>27</sup>), were purchased from the Jackson  
530 Laboratories and bred at the animal facility of the Department of Immunology,  
531 Medical University of Warsaw. Mice were housed in controlled environmental  
532 conditions in specific-pathogen-free (SPF) conditions (breeding cages, OT-I mice) or  
533 conventional (others) animal facility of the Department of Immunology, Medical  
534 University of Warsaw, with water and food provided ad libitum. For mice genotyping,  
535 DNA was isolated with DNeasy Blood & Tissue Kit (QIAGEN) according to the

536 manufacturer's instructions. The concentration and purity of DNA were determined  
537 using the NanoDrop 2000c spectrophotometer (Thermo Fisher Scientific). PCR  
538 reaction was performed using OneTaq<sup>®</sup> 2× Master Mix with Standard Buffer (New  
539 England Biolabs). Primers sequences, PCR, and agarose electrophoresis conditions  
540 were set according to genotyping protocols available on The Jackson Laboratory  
541 website (<https://www.jax.org>). The experiments were performed in accordance with  
542 the guidelines approved by the II Local Ethics Committee in Warsaw (approval No.  
543 WAW2/117/2019 and WAW2/143/2020) and in accordance with the requirements of  
544 the EU (Directive 2010/63/EU) and Polish (Dz. U. poz. 266/15.01.2015) legislation.

545

#### 546 **Animal anemia models**

547 To induce non-hemolytic anemia (NHA) mice were phlebotomized 4 and 2 days  
548 before harvest. At least 100 µl of blood was collected each time. To induce hemolytic  
549 anemia (HA), mice were injected intraperitoneally (i.p.) three days before harvest with  
550 50 mg per kg body weight of phenylhydrazine (PHZ) hydrochloride solution (HA-PHZ)  
551 or mice were injected intravenously (i.v.) six days before harvest with 45 µg of anti-  
552 TER119 monoclonal antibody (TER-119, BioXCell) into the caudal vein. For the  
553 analysis of stress erythropoiesis, mice were injected i.v. with 30 µg of anti-TER119  
554 monoclonal antibody (TER-119, BioXCell) into caudal vein followed by the monitoring  
555 of RBC count in the peripheral blood. For complete blood count, blood was collected  
556 into EDTA-coated tubes from inferior palpebral veins and examined using Sysmex  
557 XN-2000 Hematology Analyzer. The parameters of complete blood counts and  
558 reference intervals<sup>61</sup> are presented in Supplementary Fig. 1. For the analysis of  
559 amino acid concentration, blood was collected into IMPROMINI<sup>®</sup> Gel & Clot Activator  
560 Tubes. Tubes were gently inverted five times to mix the clot activator and incubated

561 for 30 min at room temperature (RT) followed by centrifugation for 10 min at 1000 x g  
562 at 4°C. Serum was collected and stored at -20°C until analysis. L-arg concentration in  
563 the serum was determined with ultra-performance liquid chromatography-tandem  
564 mass spectrometry (UPLC-MS/MS) method on Waters Xevo TQ-S mass  
565 spectrometer equipped with Waters Acquity UPLC chromatograph (Waters) in the  
566 Mass Spectrometry Lab at the Institute of Biochemistry and Biophysics, Polish  
567 Academy of Sciences, Warsaw, Poland.

568

## 569 **Antibodies**

570 Fluorophore- or biotin-conjugated antibodies specific for mouse cell-surface antigens  
571 and cytokines were as follows: anti-CD71 (8D3, NovusBio; R17217, eBioscience),  
572 anti-TER119 (TER-119, BioLegend), anti-CD45.2 (104, BD Biosciences), anti-CD45  
573 (30-F11, BioLegend), anti-CD44 (IM7, BioLegend), anti-CD3e (145-2C11,  
574 eBioscience), anti-CD4 (GK1.5, eBioscience; RM4-5. eBioscience), anti-CD8a (53-  
575 6.7, eBioscience), anti-CD69 (H1.2F4, eBioscience), anti-CD25 (PC61.5,  
576 eBioscience), anti-CD62L (MEL-14, Invitrogen), anti-CD11b (M1/70, BioLegend),  
577 anti-CD11c (HL3, BD Bioscience), anti-CD3 zeta (H146-968, Abcam), anti-IFN- $\gamma$   
578 (XMG1.2, eBioscience), anti-TNF- $\alpha$  (MP6-XT22, eBioscience), anti-Arg1 (polyclonal,  
579 IC5868P/F, R&D Systems), anti-Arg2 (ab81505, Abcam), goat anti-rabbit IgG  
580 (Invitrogen).

581 Fluorophore- or biotin-conjugated antibodies specific for human cell-surface antigens  
582 and cytokines were as follows: anti-CD71 (CY1G4, BioLegend, DF1513, NovusBio),  
583 anti-CD235a (HI264, BioLegend), anti-CD44 (IM7, BioLegend), anti-CD25 (BC96,  
584 eBioscience), anti-CD69 (FN50, e Bioscience), anti-CD45 (HI30, BD Bioscience),  
585 anti-CD49d (9F10, eBioscience), anti-CD36 (NL07, eBioscience), anti-CD34 (561,



586 BioLegend), anti-CD3 (OKT3, eBioscience), anti-CD4 (RPA-T4, eBioscience), anti-  
587 CD8a (RPA-T8, eBioscience), anti-IFN- $\gamma$  (4S.B3, BioLegend), anti-TNF- $\alpha$  (MAb11,  
588 BD Bioscience), anti-Arg1 (polyclonal, IC5868P/F, R&D Systems), anti-Arg2  
589 (ab137069, Abcam), goat anti-rabbit IgG (Invitrogen).

590

### 591 **Flow cytometry analysis**

592 Flow cytometry was performed on FACSCanto II (BD Biosciences) or Fortessa X20  
593 (BD Biosciences) operated by FACSDiva software. For data analysis Flow Jo v10.6.1  
594 software (TreeStar) or BD FACSDiva software (BD Biosciences) were used. Murine  
595 whole blood was collected from the inferior palpebral vein to EDTA-coated tubes.  
596 Spleens were isolated from mice and mechanically dispersed by pressing gently  
597 through a 70  $\mu$ m nylon cell strainer using a rubberized 1 ml syringe piston. Murine  
598 bone marrow was isolated from the femur by the centrifugation method. Briefly,  
599 femurs were dissected, followed by the removal of any muscle or connective tissue.  
600 The condyles and epiphysis were removed and a cleared bone was placed in  
601 microcentrifuge tubes followed by centrifugation at 2500 x g for 30 sec. Bone marrow  
602 cells were filtered through a 70  $\mu$ m nylon strainer and used for further analysis. No  
603 erythrocyte lysis was performed in flow cytometry analysis or experiments that  
604 involved analysis or isolation of CECs or RBCs. If only other types of cells were  
605 analyzed using flow cytometry, erythrocytes were lysed using ACK (Ammonium-  
606 Chloride-Potassium) Lysing Buffer (Thermo Fisher Scientific), according to the  
607 manufacturer's protocol.

608 For cell surface staining, cells were stained with Zombie NIR<sup>™</sup>, Zombie UV<sup>™</sup> or  
609 Zombie Aqua<sup>™</sup> Fixable Viability Kit (BioLegend), blocked on ice with 5% normal rat  
610 serum in FACS buffer (PBS; 1% BSA, 0.01% sodium azide), and then incubated for

611 30 min on ice with fluorochrome-labeled antibodies. Fluorochrome-conjugated  
612 antibodies used for the staining are listed above. After washing in FACS buffer, cells  
613 were immediately analyzed.

614 For nucleus staining, cells were incubated before cell surface staining with Hoechst  
615 33342 Fluorescent Stain (Invitrogen) at a final concentration of 1  $\mu\text{g/ml}$  in Dulbecco's  
616 phosphate-buffered saline (DPBS) for 30 min, followed by a wash in DPBS. For  
617 mitochondrial staining, cells were incubated before cell surface staining with  
618 MitoSpy™ Red CMXRos (BioLegend) at a final concentration of 50 nM in RPMI  
619 medium at 37°C for 30 min, followed by a wash in FACS buffer.

620 For intracellular staining, membrane-stained cells were fixed using Fixation Buffer for  
621 30 min at RT, followed by a wash with permeabilization buffer, and staining with an  
622 antibody diluted in permeabilization buffer for 30 min at RT (Intracellular Fixation &  
623 Permeabilization Buffer Set, eBioscience). For anti-ARG2 indirect intracellular  
624 staining, cells were fixed using Fixation Buffer for 30 min at RT, followed by a wash  
625 with permeabilization buffer, and staining with anti-ARG2 antibody for 1 h at RT,  
626 followed by a wash with permeabilization buffer and staining with fluorochrome-  
627 conjugated goat anti-rabbit IgG for 30 min at RT. Gating strategies used to analyze  
628 the flow cytometry data are presented in Supplementary Figures 26-44.

629

### 630 **IFN- $\gamma$ and TNF- $\alpha$ production assay of murine cells**

631 Murine splenocytes were isolated from anemic or healthy mice. Cells were plated in  
632 round-bottomed 96-well plates ( $1 \times 10^6$  cell per well) in L-arginine-free RPMI-medium  
633 (SILAC RPMI-medium, Thermo Fisher Scientific) supplemented with 10% dialyzed  
634 FBS (Thermo Fisher Scientific), 2 mM glutamine, 100 U/ml penicillin, 100  $\mu\text{g/ml}$

635 streptomycin, 40 mg/L L-lysine, and 150  $\mu$ M L-arginine (all from Sigma-Aldrich).  
636 Splenocytes were stimulated with Heat Killed *E. coli* 0111:B4 (HKEc, InvivoGen) at  
637 the concentration  $1 \times 10^6$  cells per ml or Dynabeads Mouse T-Activator CD3/CD28  
638 (ratio 1:2, Thermo Fisher Scientific) in the presence of protein transport inhibitor (BD  
639 GolgiStop™) for 6 hours. Then, cells were stained with cell surface antigens-binding  
640 antibodies, followed by fixation, permeabilization, and intracellular staining for IFN- $\gamma$   
641 and TNF- $\alpha$ . Flow cytometry was performed on Fortessa X20 (BD Biosciences). Cell  
642 viability after culture in the presence of protein transport inhibitor was >80%.

643

#### 644 **IFN- $\gamma$ and TNF- $\alpha$ production assay of human cells**

645 Human PBMCs were isolated from the peripheral blood of anemic or non-anemic  
646 patients. Cells were plated in round-bottomed 96-well plates ( $1 \times 10^6$  cell per well) in L-  
647 arginine-free RPMI-medium (SILAC RPMI-medium, Thermo Fisher Scientific)  
648 supplemented with 10% dialyzed FBS (Thermo Fisher Scientific), 2 mM glutamine,  
649 100 U/ml penicillin, 100  $\mu$ g/ml streptomycin, 40 mg/L L-lysine, and 150  $\mu$ M L-arginine  
650 (all from Sigma-Aldrich). PBMCs were stimulated with Heat Killed *E. coli* 0111:B4  
651 (HKEc, InvivoGen) at the concentration  $1 \times 10^6$  cells per ml for TNF- $\alpha$  assessment in  
652 myeloid cells or Dynabeads Human T-Activator CD3/CD28 (ratio 1:2, Thermo Fisher  
653 Scientific) for IFN- $\gamma$  assessment in T-cells in the presence of protein transport  
654 inhibitor (BD GolgiStop™) for 12 hours. Then, cells were stained with cell surface  
655 antigens-binding antibodies, followed by fixation, permeabilization, and intracellular  
656 staining for IFN- $\gamma$  and TNF- $\alpha$ . Flow cytometry was performed on Fortessa X20 (BD  
657 Biosciences). Cell viability after culture in the presence of protein transport inhibitor  
658 was >93%.

659 For the analysis of the effect of PBMC-derived CECs on T-cells activation and IFN- $\gamma$   
660 production, PBMCs were isolated from the peripheral blood healthy blood donor.  
661 CD4<sup>+</sup> or CD8<sup>+</sup> T-Cells were isolated from PBMC using EasySep™ Human CD4<sup>+</sup> or  
662 CD8<sup>+</sup> T-Cell Isolation Kit (STEMCELL Technologies) according to the manufacturer's  
663 protocols. CD4<sup>+</sup> or CD8<sup>+</sup> T-Cells were plated in round-bottomed 96-well plates (2×10<sup>4</sup>  
664 cell per well) in L-arginine-free RPMI-medium (SILAC RPMI-medium, Thermo Fisher  
665 Scientific) supplemented with 10% dialyzed FBS (Thermo Fisher Scientific), 2 mM  
666 glutamine, 100 U/ml penicillin, 100  $\mu$ g/ml streptomycin, 40 mg/L L-lysine, and 150  $\mu$ M  
667 L-arginine (all from Sigma-Aldrich). T-cells were stimulated with Dynabeads Human  
668 T-Activator CD3/CD28 (ratio 1:2, Thermo Fisher Scientific) in the presence of PBMC-  
669 derived CECs (ratio 1:2, 4×10<sup>5</sup> CECs per well). The arginase inhibitor OAT-1746  
670 (1500 nM), or N-acetylcysteine (200  $\mu$ M) were added as indicated in the figures. In  
671 these concentrations, ARGi and ROSi had no effects on T-cells nor CECs viability.  
672 Human T-cells were incubated for 72 h at 37°C in 5% CO<sub>2</sub>. Protein transport inhibitor  
673 (BD GolgiStop™) was added for the last 12 hours. Then, cells were stained with cell  
674 surface antigens-binding antibodies, followed by fixation, permeabilization, and  
675 intracellular staining for IFN- $\gamma$  and TNF- $\alpha$ . Flow cytometry was performed on  
676 Fortessa X20 (BD Biosciences). Cell viability after culture in the presence of protein  
677 transport inhibitor was >86%.

678

### 679 ***In vivo* OVA immunization and analysis of the humoral response**

680 Control and NHA mice were immunized with albumin from chicken egg white (OVA,  
681 Ovalbumin) from Sigma (Grade VII). Each mouse received 25  $\mu$ g of OVA with  
682 Imject™ Alum Adjuvant (ALUM, Thermo Fisher Scientific) at a ratio of 1:1 in the final  
683 volume of 100  $\mu$ l per mouse administered i.p. After 14 days, mice were challenged

684 once again with the same dose of OVA-ALUM. NHA mice were divided into three  
685 groups. NHA before mice were phlebotomized before first immunization, NHA boost  
686 mice were phlebotomized before second OVA immunization, and NHA both were  
687 phlebotomized before first and second immunization (see Supplementary Fig. 3c).  
688 Untreated mice received Imject™ Alum Adjuvant without OVA. Blood was obtained  
689 from mice 14 days after the second immunization, plasma was isolated and stored at  
690 -80°C. The concentration of anti-OVA IgG antibodies was determined using Anti-  
691 Ovalbumin IgG1 (mouse) ELISA Kit (Cayman Chemical).

692

### 693 ***In vivo* proliferation assay**

694 OVA (SIINFEKL)-specific CD8<sup>+</sup> T cells were isolated from the spleen and lymph  
695 nodes of healthy 6-8-week old OT-I mice using EasySep™ Mouse CD8<sup>+</sup> T-Cell  
696 Isolation Kit (STEMCELL Technologies) according to the manufacturer's protocols.  
697 Isolated OT-I cells labeled with CTV for 20 min at 37°C at a final concentration of 2.5  
698 µM in PBS, washed and transferred into the caudal tail vein of host C57BL/6 mice at  
699 a cell number of 7×10<sup>6</sup> in 150 µl of PBS. Twenty-four hours post OT-I T-cells  
700 inoculation, host mice were challenged with 7.5 µg of full-length OVA protein (grade  
701 V, Sigma Aldrich) injected into the caudal tail vein. Three mice from controls were  
702 injected only with PBS (negative control). On day 3 post OVA immunization, spleens  
703 were harvested, mashed through a 70 µm nylon strainer, stained with OVA-specific  
704 MHC tetramers (iTAg Tetramer/PE-H-2 K<sup>b</sup> OVA (SIINFEKL), MBL Inc., WA, USA) to  
705 detect OT-I CD8<sup>+</sup> T-cells, followed by anti-CD3 and anti-CD8 staining, and analyzed  
706 for proliferation by flow cytometry. The gate for proliferating cells (CTV<sup>low</sup>) was set  
707 using unstimulated negative control. OT-I T-cells with lower fluorescence of CTV than  
708 non-proliferating T-cells were identified as proliferating cells.

709

## 710 **Murine T-cell proliferation assay**

711 Murine T-cells were isolated from spleens of healthy 6-8-week old C57BL/6 mice  
712 using EasySep™ Mouse CD4<sup>+</sup> or CD8<sup>+</sup> T-Cell Isolation Kit (STEMCELL  
713 Technologies) according to the manufacturer's protocols. CECs were isolated from  
714 the spleens of anemic mice using the EasySep™ Release Mouse Biotin Positive  
715 Selection Kit (STEMCELL Technologies) according to the manufacturer's protocols.  
716 Biotin-conjugated anti-CD71 antibodies (anti-mouse clone 8D3, NovusBio,) were  
717 used at a final concentration of 1 µg/ml. CECs purity was >80%. For cell proliferation  
718 assay, T-cells were labeled with Cell Trace Violet (CTV) dye (Thermo Fisher  
719 Scientific) for 20 min at 37°C at a final concentration of 2.5 µM in PBS. Next, the  
720 labeled T-cells were plated in round-bottomed 96-well plates (5×10<sup>4</sup> cell per well) in  
721 L-arginine-free RPMI-medium (SILAC RPMI-medium, Thermo Fisher Scientific)  
722 supplemented with 10% (v/v) dialyzed FBS (Thermo Fisher Scientific), 2 mM  
723 glutamine, 100 U/ml penicillin, 100 µg/ml streptomycin, 1% (v/v) MEM non-essential  
724 amino acids solution (Thermo Fisher Scientific), 50 µM 2-Mercaptoethanol  
725 (Thermofisher Scientific), and 150 µM L-arginine and 40 mg/L L-lysine (SigmaAldrich).  
726 Proliferation was triggered by the stimulation with Dynabeads Mouse T-Activator  
727 CD3/CD28 (ratio 1:2, Thermo Fisher Scientific). The arginase inhibitor OAT-1746  
728 (ARGi, 500 nM), L-arginine (1000 µM), or N-acetylcysteine (ROSi, 100 µM) were  
729 added as indicated in the figures. In these concentrations, ARGi and ROSi had no  
730 effects on T-cells nor CECs viability. Murine CECs were added to the wells in a 1:2  
731 ratio (1×10<sup>5</sup> CECs per well). Murine T-cells were incubated for 72 h at 37°C in 5%  
732 CO<sub>2</sub>. Then, cells were harvested, stained with live/dead Zombie dye (Biolegend),  
733 anti-CD3 and anti-CD4 or anti-CD8 antibody, and analyzed by flow cytometry. The

734 gate for proliferating cells was set based on the unstimulated controls. Cell  
735 autofluorescence was determined using CTV-unstained controls. Percentages of  
736 proliferating cells were calculated using the FlowJo Software v10.6.1 (Tree Star).

737

### 738 **Human T-cell proliferation assay**

739 Human T-cells were isolated from peripheral blood mononuclear cells (PBMC)  
740 isolated from buffy coats commercially obtained from the Regional Blood Centre in  
741 Warsaw, Poland using EasySep™ Human CD4<sup>+</sup> or CD8<sup>+</sup> T-Cell Isolation Kit  
742 (STEMCELL Technologies) according to the manufacturer's protocols. CECs were  
743 isolated from human bone marrow aspirates or PBMC derived CECs culture using  
744 EasySep™ Release Mouse Biotin Positive Selection Kit (STEMCELL Technologies)  
745 according to the manufacturer's protocols. Biotin-conjugated anti-CD71 antibodies  
746 (anti-human clone DF1513, NovusBio) were used at a final concentration of 1 µg/ml.  
747 CECs purity was >80%. For cell proliferation assay, T-cells were labeled with Cell  
748 Trace Violet (CTV) dye (Thermo Fisher Scientific) for 20 min at 37°C at a final  
749 concentration of 2.5 µM in PBS. Next, the labeled T-cells were plated in round-  
750 bottomed 96-well plates (2×10<sup>4</sup> cell per well) in L-arginine-free RPMI-medium (SILAC  
751 RPMI-medium, Thermo Fisher Scientific) supplemented with 10% (v/v) dialyzed FBS  
752 (Thermo Fisher Scientific), 2 mM glutamine, 100 U/ml penicillin, 100 µg/ml  
753 streptomycin, 1% (v/v) MEM non-essential amino acids solution (Thermo Fisher  
754 Scientific), 50 µM 2-Mercaptoethanol (Thermo Fisher Scientific), and 150 µM L-  
755 arginine and 40 mg/L L-lysine (SigmaAldrich). Proliferation was triggered by the  
756 stimulation with Dynabeads Human T-Activator CD3/CD28 (ratio 1:2, Thermo Fisher  
757 Scientific). The arginase inhibitor OAT-1746 (1500 nM), or N-acetylcysteine (200 µM)  
758 were added as indicated in the figures. In these concentrations, ARGi and ROSi had

759 no effects on T-cells nor CECs viability. Human CECs were added to the wells in a  
760 1:2 ratio ( $4 \times 10^5$  CECs per well). T-cells were incubated for 120 h at 37°C in 5% CO<sub>2</sub>.  
761 Then, cells were harvested, stained with live/dead Zombie dye (Biolegend), anti-CD3  
762 and anti-CD4 or anti-CD8 antibody, and analyzed by flow cytometry. The gate for  
763 proliferating cells was set based on the unstimulated controls. Cell autofluorescence  
764 was determined using CTV-unstained controls. Percentages of proliferating cells  
765 were calculated using the FlowJo Software v10.6.1 (Tree Star).

766

### 767 **CECs-conditioned medium (CM)**

768 Conditioned medium was obtained by culturing CECs in the arginine-free RPMI-  
769 medium (SILAC RPMI-medium, Thermo Fisher Scientific) supplemented with 150 µM  
770 L-arginine at the density  $1 \times 10^6$  cells/ml for 24h. Cells were centrifuged and the  
771 supernatant was collected and immediately frozen at -80°C. After thawing, the  
772 supernatant was filtered through a 0.45 µm Syringe Filter (Wenk LabTec) and was  
773 used in experiments a 1:1 ratio with 150 µM L-arginine RPMI SILAC medium.

774

### 775 **Reactive oxygen species (ROS) detection**

776 The level of ROS in cells was determined using CellROX Green Reagent (Thermo  
777 Fisher Scientific) or 2',7'-dichlorodihydrofluorescein diacetate (DCFDA). Cells were  
778 stained with CellROX at a final concentration of 5 µM or DCFDA at a final  
779 concentration of 10 µM in pre-warmed PBS for 30 minutes at 37°C, followed by three  
780 washes with PBS. H<sub>2</sub>O<sub>2</sub>-treated cells served as positive controls. For some  
781 experiments, cells stained with CellROX or DCFDA were further stained with



782 fluorochrome-labeled antibodies on ice. Stained cells were acquired on Fortessa X20  
783 flow cytometer (BD Biosciences).

784

### 785 **Arginase activity assay and Griess test**

786 Recombinant enzymes (ARG1 and ARG2) to study ARGi were produced at  
787 OncoArendi Therapeutics in *E. coli* expression system and purified by the FPLC  
788 method. The proteins were purified by FPLC and stored at -80°C in the storage buffer  
789 containing: 20 mM Tris pH 8.0, 100 mM NaCl, 10 mM DDT and 10% glycerol. The  
790 basic assay buffer was composed of 100 mM sodium phosphate buffer, 130 mM  
791 sodium chloride, 1 mg/mL BSA, pH 7.4. The enzymatic reaction was carried out in  
792 the presence of 200 µM MnCl<sub>2</sub> (cofactor) and 10 mM or 20 mM L-arginine  
793 hydrochloride (for hARG1 or hARG2, respectively), mixed at the final volume of 25  
794 µL. Basic developing buffer contained 50 mM boric acid, 1 M sulfuric acid, 0.03%  
795 (m/v) Brij<sup>®</sup> 35 detergent. PHZ or ABH was diluted in basic assay buffer at the volume  
796 of 50 µL. The recombinant enzyme was diluted in a basic assay buffer at the volume  
797 of 25 µL. The reaction was performed at the final volume of 100 µL. Developing  
798 mixture included freshly prepared equal volume mixture of developing solution A (4  
799 mM o-phthaldialdehyde) and solution B (4 mM N-(1-naphthyl)ethylenediamine  
800 dihydrochloride) prepared in the basic developing buffer. The compound background  
801 wells contained each of the tested compounds and the substrate/cofactor mixture,  
802 but not the recombinant enzyme (data were excluded from the analysis when the  
803 compound background exceeded 10% of the signal obtained in the wells with  
804 enzyme). The “0% activity” background wells contained only the substrate/cofactor  
805 mixture. Following 1 h incubation at 37°C, the freshly prepared developing reagent  
806 was added (150 µL) and the colorimetric reaction was developed (12 min at RT,

807 gentle shaking). The absorbance, proportional to the amount of the produced urea,  
808 was measured at 515 nm using Tecan's Spark™ microplate reader. Data were  
809 normalized by referring the absorbance values to the positive control wells (100%  
810 enzyme activity). The IC<sub>50</sub> value was determined by the nonlinear regression method.  
811 Arginase activity in the CECs or splenocytes lysates and cell supernatant was  
812 determined using Arginase Activity Assay (Sigma) according to the manufacturer's  
813 protocol.

814 To evaluate nitric oxide (NO) production as a measure of NOS (nitric oxide  
815 synthase) activity, Griess Reagent System (Promega) was used according to the  
816 manufacturer's protocol. Splenocytes or CECs were isolated from murine spleens  
817 and were cultured in non-adherent 6-well plate  $1 \times 10^6$  or  $5 \times 10^5$  cells per 2 ml,  
818 respectively, for 24h followed by supernatants collection and measurement of NO  
819 concentration.

820

### 821 **Bioinformatical analysis of arginase structure**

822 The structure and predicted binding energies for the complexes of PHZ, L-arginine  
823 and 2-amino-6-borono-2-(2-(piperidin-1-yl)ethyl)hexanoic acid with both human and  
824 mouse arginases were compared. The 3D models of mouse arginases were  
825 proposed using available structures of human arginases (pdb|4hww and pdb|4hze for  
826 ARG1 and ARG2, respectively) as templates. Both templates shared more than 87 %  
827 sequence identity with their respective target. The sequence to structure alignments  
828 between mouse arginases and selected templates were calculated with the muscle  
829 program<sup>62</sup>. The 3D structure was proposed with MODELLER<sup>63</sup>. Models quality was  
830 assessed with the Molprobitry webserver<sup>64</sup>. Next, both human and mouse proteins  
831 were prepared for docking using the Chimera dock prep module. Molecular docking

832 was carried out with two programs - GOLD<sup>65</sup> and Surflex<sup>66</sup>. The active site was  
833 specified based on the position of the inhibitor present in the active site of the  
834 arginase 1 (pdb|4hww). The default parameters of both programs were used.

835 To assess if PHZ remains stably bound to the active site of both human  
836 arginases short molecular dynamics simulations were performed. The initial  
837 configurations of ligand-protein complexes were derived from docking results for  
838 PHZ. For the PHZ-arginase complexes the simulation included the following steps.  
839 First protein and ligand were put in a dodecahedron box with the distance between  
840 solute and a box equal to 1 nm. The 0.1 M NaCl was added to the system including  
841 neutralizing counterions. After energy minimization using the steepest descent  
842 algorithm, 100 ps NVT and NPT simulation were carried out. For this modified  
843 Berendsen thermostat was used to maintain the temperature at 310 K using and  
844 Berendsen barostat to keep the pressure at 1 atm. Positions of both protein and  
845 ligand heavy atoms remained constrained. During the following 300 ps of simulation  
846 time, the ligand's constraints were gradually removed. Finally, an unconstrained 100  
847 ns simulation is performed in which Berendsen barostat was replaced by Parrinello-  
848 Rahman barostat. During simulation short-range nonbonded interactions were cut off  
849 at 1.4nm, with long-range electrostatics calculated using the particle mesh Ewald  
850 (PME) algorithm. Bonds were constrained using the lincs algorithm. Simulations were  
851 carried out with Gromacs<sup>67</sup> using the gromos54a7 force field, modified to include  
852 parameters for Mn<sup>2+</sup> ion adopted from<sup>68</sup>. Spc model was used for water molecules.  
853 Parameters for the ligand were obtained with Automated Topology Builder (ATB)<sup>69</sup>.

854 Additional analyses were performed to assess if PHZ can migrate to the  
855 arginase active site when present in solute in high concentration. For this analysis  
856 protein was put in dodecahedron box with the distance between solute and a box

857 equal to 1.5 nm in which 6 PHZ molecules were placed randomly. This corresponds  
858 to 0.02 M concentration of the compound. A similar simulation setup to one described  
859 above was used with exception that ligand molecules remained unconstrained  
860 throughout simulation.

861

## 862 **Protein carbonylation assay**

863 The carbonyl content of proteins was determined in a 2,4-DNPH reaction. Five  $\mu\text{g}$  of  
864 murine ARG1 (Cloud-System Corp) was resuspended in 400  $\mu\text{l}$  of distilled water and  
865 incubated with PHZ (10  $\mu\text{M}$ ), PHZ (10  $\mu\text{M}$ ) with NAC (10 mM),  $\text{H}_2\text{O}_2$  (10 mM) or  
866 water (negative control) as indicated in the Fig. 3d for 1 hour at 37°C. Proteins were  
867 precipitated with 10% TCA. The precipitates were treated with either 2N HCl alone  
868 (control) or 2N HCl containing 5 mg/ml 2,4-DNPH at RT for 30 min. The resulting  
869 hydrazones were precipitated in 10% TCA and then washed three times with ethanol-  
870 ethyl acetate (1:1). Final precipitates were dissolved in 8 M guanidine chloride. Equal  
871 amounts of proteins were separated on 4-12% SDS-polyacrylamide gel (Bio-Rad),  
872 transferred onto nitrocellulose membranes (Bio-Rad) blocked with TBST [Tris-  
873 buffered saline (pH 7.4) and 0.05% Tween 20] supplemented with 5% non-fat milk.  
874 Anti-DNP antibodies (Life Diagnostics, Inc) at concentration 1 U/ml were used for  
875 overnight incubation at 4°C. After washing with TBST, the membranes were  
876 incubated with horseradish peroxidase-coupled secondary antibodies (Jackson  
877 ImmunoRes.). The reaction was developed using SuperSignal™ West Femto  
878 Maximum Sensitivity Substrate (ThermoFisher Scientific) and imaged using  
879 ChemiDoc Touch Gel Imaging System (Bio-Rad). Densitometry was done using  
880 ImageJ software.

881

882 **RNA isolation from CECs, reverse transcription, and quantitative polymerase**  
883 **chain reaction**

884 Total RNA was isolated from CECs isolated from murine spleens using RNeasy Mini  
885 Kit (Qiagen). RNA was subjected to reverse transcription using the GoScript™  
886 Reverse Transcriptase system (Promega). All qPCRs were performed in MicroAmp  
887 Fast Optical 96 Well Reaction Plates (Thermo Fisher Scientific) using  
888 Applied Biosystems 7500 Fast Real-Time PCR System with 7500 Software V2.0.6  
889 (Thermo Fisher Scientific). Samples were assayed in triplicates. Primers sequences  
890 used in the study: ARG1 forward 5'-CTCCAAGCCAAAGTCCTTAGAG-3', reverse 5'-  
891 AGGAGCTGTCATTAGGGACATC-3', ARG2 forward 5'-  
892 AGGAGTGGAATATGGTCCAGC-3', reverse 5'-GGGATCATCTTGTGGGACATT-3',  
893 and GAPDH forward 5'-GAAGGTGGTGAAGCAGGCATC-3', reverse 5'-  
894 GCATCGAAGGTGGAAGAGTGG-3' as an endogenous control. The mean Ct values  
895 of a target gene and endogenous control were used to calculate relative expression  
896 using the  $2^{-\Delta Ct}$  method.

897

898 **Western blot**

899 Splenocytes lysates were prepared using Cell Lysis Buffer (#9803, Cell Signaling  
900 Technology) supplemented with protease inhibitors (Roche) according to the  
901 manufacturer's protocol. Total protein concentration was assessed using Pierce BCA  
902 Protein Assay Kit (Thermo Fisher Scientific). Equal amounts of whole-cell protein  
903 lysates samples were boiled in Laemmli loading buffer, separated on 4-12% SDS-  
904 polyacrylamide gel (Biorad), transferred onto nitrocellulose membranes (Bio-Rad)  
905 blocked with TBST [Tris-buffered saline (pH 7.4) and 0.05% Tween 20]  
906 supplemented with 5% non-fat milk. Anti-Arg1 antibodies (polyclonal, GTX109242,

907 GeneTex) at dilution 1:2000 or anti-Arg2 antibodies (polyclonal, ab81505, Abcam) at  
908 dilution 1:1000 were used for overnight incubation at 4°C. After washing with TBST,  
909 the membranes were incubated with horseradish peroxidase-coupled secondary  
910 antibodies (Jackson ImmunoResearch). The reaction was developed using  
911 SuperSignal™ West Femto Maximum Sensitivity Substrate (Thermofisher Scientific)  
912 and imaged using ChemiDoc Touch Gel Imaging System (Bio-Rad). After imaging,  
913 bound antibodies were removed from membranes using Restore™ PLUS Western  
914 Blot Stripping Buffer (Thermofisher Scientific), followed by blocking with TBST  
915 supplemented with 5% non-fat milk. Next, the membranes were incubated with anti-  
916  $\beta$ -Actin (A5060, Santa Cruz) conjugated with peroxidase. Densitometric  
917 quantifications were done using ImageJ software.

918

### 919 **Erythroid cells differentiation**

920 CECs were differentiated from human peripheral blood mononuclear cells (PBMC)  
921 according to the protocol by Heshusius et al.<sup>70</sup> with modifications. Human PBMC  
922 were purified from buffy coats from healthy donors by density separation using  
923 Lymphoprep (STEMCELL Technologies). PBMC were seeded at  $1 \times 10^6$  cells/mL in  
924 erythroid differentiation-promoting medium based on StemSpan™ Serum-Free  
925 Expansion Medium (SFEM) supplemented with human recombinant EPO (2 U/ml,  
926 Roche), human recombinant stem cell factor (25 ng/ml, R&DSystems),  
927 dexamethasone (1  $\mu$ M, SigmaAldrich), human recombinant insulin (10 ng/ml,  
928 SigmaAldrich), L-Glutamine (2 mM, SigmaAldrich), iron-saturated holo-transferrin (20  
929  $\mu$ g/ml, Sigma-Aldrich), sodium pyruvate (1 mM, Gibco), MEM non-essential amino  
930 acids (1% v/v, Gibco), bovine serum albumin (0.1% m/v, SigmaAldrich), EmbryoMax  
931 Nucleosides (1% v/v, Merck), and 100 U/ml penicillin and 100  $\mu$ g/ml streptomycin

932 (SigmaAldrich). The expansion and differentiation of CECs were assessed by flow  
933 cytometry.

934

### 935 **Statistics and Reproducibility**

936 Data are shown as means  $\pm$  SD or means  $\pm$  SEM, as indicated in the figure legends.  
937 Graphpad Prism 8.4.3 (GraphPad Software) was used for statistical analyses. Data  
938 distribution was tested using the Shapiro-Wilk test, D'Agostino & Pearson test, and  
939 Kolmogorov-Smirnov test. Statistical analyses of three or more groups were  
940 compared using one-way analysis of variance (ANOVA) or Brown-Forsythe ANOVA  
941 followed by Tukey's, Dunnett's, or Bonferroni's multiple comparisons test or Kruskal-  
942 Wallis test followed by Dunn's multiple comparisons test. Repeated measures  
943 ANOVA with Sidak's or Holm-Sidak's post-hoc tests were used to analyze the  
944 differences in paired samples. Statistical analyses of two groups were compared  
945 using unpaired *t*-test, paired *t*-test, or Mann-Whitney test. Methods of statistical  
946 analyses are defined in every figure legend. *P*-value of less than 0.05 was  
947 statistically significant. Each experiment was performed in technical duplicates or  
948 triplicates. The number of biological replicates for each experiment is mentioned in  
949 the figure legends.

950

### 951 **Data availability**

952 Source data underlying the graphs and charts presented in the figures are available  
953 in the Supplementary Data. Uncropped western blots are provided in the  
954 Supplementary Data file. Any remaining information can be obtained from  
955 corresponding authors upon reasonable request.

956 **Acknowledgments**

957 This work has been co-supported by grants iONKO (Regionalna Inicjatywa  
958 Doskonalosci) from the Polish Ministry of Science and Higher Education (J.G.),  
959 2019/35/B/NZ6/00540 (D.N.), 2017/25/B/NZ6/01139 (J.G.), and  
960 2016/23/B/NZ6/03463 (D.N.) from the National Science Center in Poland. D.P. and  
961 M.L. are financed by TEAM program from the Foundation for Polish Science co-  
962 financed by the European Union under the European Regional Development Fund as  
963 well as grants 2019/35/O/ST6/02484 and 2020/37/B/NZ2/03757 from the National  
964 Science Center in Poland. M.L. is funded by IDUB against COVID-19 project granted  
965 by the Warsaw University of Technology under the program Excellence Initiative:  
966 Research University (IDUB). Some elements of the figures were generated with  
967 Biorender.com.

968

969 **Authorship Contributions**

970 TM.G. designed and supervised the study, conducted the experiments, analyzed the  
971 data, and wrote the manuscript. A.S. participated in *in vivo* studies. Z.R. participated  
972 in *in vitro* experiments. M.L. and D.P. performed molecular docking and molecular  
973 dynamics simulations, K.K. performed real-time qPCR and participated in *in vitro*  
974 experiments, M.M. and O.C. collected and provided human blood samples, A.R.-L.  
975 performed analysis of murine blood, M.J. participated in *in vitro* experiments, P.P and  
976 M.M.G. carried out arginase activity assays, R.B. designed and synthesized OAT-  
977 1746, M.W. bred and provided *Arg2<sup>-/-</sup>* mice, A.T and G.B. collected and provided  
978 HSPCs. J.G. conceived, designed and supervised the study, provided funding and  
979 wrote the manuscript. D.N. provided funding, performed *in vivo* studies, designed and



980 supervised the study, and wrote the manuscript. All authors edited and approved the  
981 final manuscript.

## 982 **Competing interests**

983 P.P., M.M.G., and R.B. are employees of OncoArendi Therapeutics, Warsaw,  
984 Poland.

## 985 **References**

- 986 1 Hom, J., Dulmovits, B. M., Mohandas, N. & Blanc, L. The erythroblastic island  
987 as an emerging paradigm in the anemia of inflammation. *Immunologic*  
988 *Research* **63**, 75-89, doi:10.1007/s12026-015-8697-2 (2015).
- 989 2 Elahi, S. Neglected Cells: Immunomodulatory Roles of CD71+ Erythroid Cells.  
990 *Trends in Immunology* **40**, 181-185, doi:<https://doi.org/10.1016/j.it.2019.01.003>  
991 (2019).
- 992 3 Shokrollah, E. & Siavash, M. Immunological consequences of extramedullary  
993 erythropoiesis: immunoregulatory functions of CD71+ erythroid cells.  
994 *Haematologica* **105**, 1478-1483, doi:10.3324/haematol.2019.243063 (2020).
- 995 4 Elahi, S. *et al.* Immunosuppressive CD71+ erythroid cells compromise  
996 neonatal host defence against infection. *Nature* **504**, 158,  
997 doi:10.1038/nature12675 (2013).
- 998 5 Grzywa, T. M., Nowis, D. & Golab, J. The role of CD71+ erythroid cells in the  
999 regulation of the immune response. *Pharmacology & Therapeutics* **228**,  
1000 107927, doi:<https://doi.org/10.1016/j.pharmthera.2021.107927> (2021).
- 1001 6 Namdar, A. *et al.* CD71+ erythroid suppressor cells impair adaptive immunity  
1002 against Bordetella pertussis. *Scientific Reports* **7**, 7728, doi:10.1038/s41598-  
1003 017-07938-7 (2017).
- 1004 7 Yang, L. *et al.* Regulation of bile duct epithelial injury by hepatic CD71+  
1005 erythroid cells. *JCI Insight* **5**, doi:10.1172/jci.insight.135751 (2020).
- 1006 8 Delyea, C. *et al.* CD71(+) Erythroid Suppressor Cells Promote Fetomaternal  
1007 Tolerance through Arginase-2 and PDL-1. *J Immunol* **200**, 4044-4058,  
1008 doi:10.4049/jimmunol.1800113 (2018).
- 1009 9 Chen, J. *et al.* Intratumoral CD45+CD71+ erythroid cells induce immune  
1010 tolerance and predict tumor recurrence in hepatocellular carcinoma. *Cancer*  
1011 *Letters*, doi:<https://doi.org/10.1016/j.canlet.2020.12.003> (2020).
- 1012 10 Zhao, L. *et al.* Late-stage tumors induce anemia and immunosuppressive  
1013 extramedullary erythroid progenitor cells. *Nature Medicine* **24**, 1536-1544,  
1014 doi:10.1038/s41591-018-0205-5 (2018).
- 1015 11 Shim, Y. A., Weliwitigoda, A., Campbell, T., Dosanjh, M. & Johnson, P.  
1016 Splenic erythroid progenitors decrease TNF $\alpha$  production by macrophages and  
1017 reduce systemic inflammation in a mouse model of T cell-induced colitis.  
1018 *European Journal of Immunology* **n/a**,  
1019 doi:<https://doi.org/10.1002/eji.202048687> (2020).

- 1020 12 Namdar, A. *et al.* CD71<sup>+</sup> Erythroid Cells Exacerbate HIV-1  
1021 Susceptibility, Mediate *trans*-Infection, and Harbor Infective Viral  
1022 Particles. *mBio* **10**, e02767-02719, doi:10.1128/mBio.02767-19 (2019).
- 1023 13 Shahbaz, S. *et al.* Erythroid precursors and progenitors suppress adaptive  
1024 immunity and get invaded by SARS-CoV-2. *Stem Cell Reports* **16**, 1165-1181,  
1025 doi:<https://doi.org/10.1016/j.stemcr.2021.04.001> (2021).
- 1026 14 Hara, H. & Ogawa, M. Erythropoietic precursors in mice with phenylhydrazine-  
1027 induced anemia. *American Journal of Hematology* **1**, 453-458,  
1028 doi:<https://doi.org/10.1002/ajh.2830010410> (1976).
- 1029 15 Hara, H. & Ogawa, M. Erythropoietic precursors in mice under erythropoietic  
1030 stimulation and suppression. *Exp Hematol* **5**, 141-148 (1977).
- 1031 16 Chen, K. *et al.* Resolving the distinct stages in erythroid differentiation based  
1032 on dynamic changes in membrane protein expression during erythropoiesis.  
1033 *Proc Natl Acad Sci U S A* **106**, 17413-17418, doi:10.1073/pnas.0909296106  
1034 (2009).
- 1035 17 Elahi, S. *et al.* CD71<sup>+</sup> Erythroid Cells in Human Neonates Exhibit  
1036 Immunosuppressive Properties and Compromise Immune Response Against  
1037 Systemic Infection in Neonatal Mice. *Frontiers in Immunology* **11**,  
1038 doi:10.3389/fimmu.2020.597433 (2020).
- 1039 18 Rodriguez, P. C. *et al.* Arginase I production in the tumor microenvironment by  
1040 mature myeloid cells inhibits T-cell receptor expression and antigen-specific T-  
1041 cell responses. *Cancer research* **64**, 5839-5849, doi:10.1158/0008-5472.CAN-  
1042 04-0465 (2004).
- 1043 19 Modolell, M. *et al.* Local suppression of T cell responses by arginase-induced  
1044 L-arginine depletion in nonhealing leishmaniasis. *PLoS Negl Trop Dis* **3**, e480-  
1045 e480, doi:10.1371/journal.pntd.0000480 (2009).
- 1046 20 Van Zandt, M. C. *et al.* Discovery of (R)-2-amino-6-borono-2-(2-(piperidin-1-  
1047 yl)ethyl)hexanoic acid and congeners as highly potent inhibitors of human  
1048 arginases I and II for treatment of myocardial reperfusion injury. *Journal of*  
1049 *medicinal chemistry* **56**, 2568-2580, doi:10.1021/jm400014c (2013).
- 1050 21 Itano, H. A., Hirota, K. & Hosokawa, K. Mechanism of induction of haemolytic  
1051 anaemia by phenylhydrazine. *Nature* **256**, 665-667, doi:10.1038/256665a0  
1052 (1975).
- 1053 22 Czystowska-Kuzmicz, M. *et al.* Small extracellular vesicles containing  
1054 arginase-1 suppress T-cell responses and promote tumor growth in ovarian  
1055 carcinoma. *Nature Communications* **10**, 3000, doi:10.1038/s41467-019-  
1056 10979-3 (2019).
- 1057 23 Sosnowska, A. *et al.* Inhibition of arginase modulates T-cell response in the  
1058 tumor microenvironment of lung carcinoma. *Oncol Immunology* **10**, 1956143,  
1059 doi:10.1080/2162402X.2021.1956143 (2021).
- 1060 24 Pilanc, P. *et al.* A Novel Oral Arginase 1/2 Inhibitor Enhances the Antitumor  
1061 Effect of PD-1 Inhibition in Murine Experimental Gliomas by Altering the  
1062 Immunosuppressive Environment. *Frontiers in Oncology* **11**,  
1063 doi:10.3389/fonc.2021.703465 (2021).
- 1064 25 Rodriguez, P. C. *et al.* Regulation of T cell receptor CD3zeta chain expression  
1065 by L-arginine. *J Biol Chem* **277**, 21123-21129, doi:10.1074/jbc.M110675200  
1066 (2002).
- 1067 26 Czystowska-Kuzmicz, M. *et al.* Small extracellular vesicles containing  
1068 arginase-1 suppress T-cell responses and promote tumor growth in ovarian

- 1069 carcinoma. *Nature communications* **10**, 3000, doi:10.1038/s41467-019-10979-  
1070 3 (2019).
- 1071 27 Shi, O., Morris, S. M., Jr., Zoghbi, H., Porter, C. W. & O'Brien, W. E.  
1072 Generation of a mouse model for arginase II deficiency by targeted disruption  
1073 of the arginase II gene. *Mol Cell Biol* **21**, 811-813, doi:10.1128/mcb.21.3.811-  
1074 813.2001 (2001).
- 1075 28 Hu, J. *et al.* Isolation and functional characterization of human erythroblasts at  
1076 distinct stages: implications for understanding of normal and disordered  
1077 erythropoiesis in vivo. *Blood* **121**, 3246-3253, doi:10.1182/blood-2013-01-  
1078 476390 (2013).
- 1079 29 Nandakumar, S. K., Ulirsch, J. C. & Sankaran, V. G. Advances in  
1080 understanding erythropoiesis: evolving perspectives. *Br J Haematol* **173**, 206-  
1081 218, doi:10.1111/bjh.13938 (2016).
- 1082 30 Chénais, B., Molle, I., Trentesaux, C. & Jeannesson, P. Time-course of butyric  
1083 acid-induced differentiation in human K562 leukemic cell line: rapid increase in  
1084  $\gamma$ -globin, porphobilinogen deaminase and NF-E2 mRNA levels. *Leukemia* **11**,  
1085 1575-1579, doi:10.1038/sj.leu.2400755 (1997).
- 1086 31 Moras, M., Lefevre, S. D. & Ostuni, M. A. From Erythroblasts to Mature Red  
1087 Blood Cells: Organelle Clearance in Mammals. *Frontiers in Physiology* **8**,  
1088 doi:10.3389/fphys.2017.01076 (2017).
- 1089 32 Grzywa, T. M. *et al.* Myeloid Cell-Derived Arginase in Cancer Immune  
1090 Response. *Front Immunol* **11**, 938, doi:10.3389/fimmu.2020.00938 (2020).
- 1091 33 Zea, A. H. *et al.* Arginase-producing myeloid suppressor cells in renal cell  
1092 carcinoma patients: a mechanism of tumor evasion. *Cancer research* **65**,  
1093 3044-3048, doi:10.1158/0008-5472.Can-04-4505 (2005).
- 1094 34 Köstlin, N. *et al.* Granulocytic myeloid derived suppressor cells expand in  
1095 human pregnancy and modulate T-cell responses. *European Journal of*  
1096 *Immunology* **44**, 2582-2591, doi:<https://doi.org/10.1002/eji.201344200> (2014).
- 1097 35 Otsuji, M., Kimura, Y., Aoe, T., Okamoto, Y. & Saito, T. Oxidative stress by  
1098 tumor-derived macrophages suppresses the expression of CD3 zeta chain of  
1099 T-cell receptor complex and antigen-specific T-cell responses. *Proc Natl Acad*  
1100 *Sci U S A* **93**, 13119-13124, doi:10.1073/pnas.93.23.13119 (1996).
- 1101 36 Reade, M. C., Weissfeld, L., Angus, D. C., Kellum, J. A. & Milbrandt, E. B. The  
1102 prevalence of anemia and its association with 90-day mortality in hospitalized  
1103 community-acquired pneumonia. *BMC Pulm Med* **10**, 15, doi:10.1186/1471-  
1104 2466-10-15 (2010).
- 1105 37 Liu, L. *et al.* Multiple myeloma hinders erythropoiesis and causes anaemia  
1106 owing to high levels of CCL3 in the bone marrow microenvironment. *Scientific*  
1107 *Reports* **10**, 20508, doi:10.1038/s41598-020-77450-y (2020).
- 1108 38 Musallam, K. M. *et al.* Preoperative anaemia and postoperative outcomes in  
1109 non-cardiac surgery: a retrospective cohort study. *The Lancet* **378**, 1396-1407,  
1110 doi:10.1016/S0140-6736(11)61381-0 (2011).
- 1111 39 Dunne, J. R., Malone, D., Tracy, J. K., Gannon, C. & Napolitano, L. M.  
1112 Perioperative anemia: an independent risk factor for infection, mortality, and  
1113 resource utilization in surgery. *J Surg Res* **102**, 237-244,  
1114 doi:10.1006/jsre.2001.6330 (2002).
- 1115 40 Kanemasa, H. *et al.* The immunoregulatory function of peripheral blood  
1116 CD71+ erythroid cells in systemic-onset juvenile idiopathic arthritis. *Scientific*  
1117 *Reports* **11**, 14396, doi:10.1038/s41598-021-93831-3 (2021).

- 1118 41 Hill, D. L. *et al.* Immune system development varies according to age, location,  
1119 and anemia in African children. *Sci Transl Med* **12**,  
1120 doi:10.1126/scitranslmed.aaw9522 (2020).
- 1121 42 Peter, V. *et al.* Normal and pathological erythropoiesis in adults: from gene  
1122 regulation to targeted treatment concepts. *Haematologica* **103**, 1593-1603,  
1123 doi:10.3324/haematol.2018.192518 (2018).
- 1124 43 Han, Y. *et al.* Tumor-Induced Generation of Splenic Erythroblast-like Ter-Cells  
1125 Promotes Tumor Progression. *Cell* **173**, 634-648.e612,  
1126 doi:10.1016/j.cell.2018.02.061 (2018).
- 1127 44 Hou, Y. *et al.* Radiotherapy and immunotherapy converge on the elimination of  
1128 tumor-promoting erythroid progenitor cells through adaptive immunity. *Science*  
1129 *Translational Medicine* **13**, eabb0130, doi:10.1126/scitranslmed.abb0130  
1130 (2021).
- 1131 45 Huang, P. *et al.* Putative regulators for the continuum of erythroid  
1132 differentiation revealed by single-cell transcriptome of human BM and UCB  
1133 cells. *Proceedings of the National Academy of Sciences* **117**, 12868-12876,  
1134 doi:10.1073/pnas.1915085117 (2020).
- 1135 46 Dunsmore, G. *et al.* Erythroid Suppressor Cells Compromise Neonatal  
1136 Immune Response against *Bordetella pertussis*. *The Journal of*  
1137 *Immunology*, ji1700742, doi:10.4049/jimmunol.1700742 (2017).
- 1138 47 Paulson, R. F., Ruan, B., Hao, S. & Chen, Y. Stress Erythropoiesis is a Key  
1139 Inflammatory Response. *Cells* **9**, doi:10.3390/cells9030634 (2020).
- 1140 48 Greten, F. R. & Grivnenkov, S. I. Inflammation and Cancer: Triggers,  
1141 Mechanisms, and Consequences. *Immunity* **51**, 27-41,  
1142 doi:10.1016/j.immuni.2019.06.025 (2019).
- 1143 49 Dunsmore, G. *et al.* Lower Abundance and Impaired Function of CD71+  
1144 Erythroid Cells in Inflammatory Bowel Disease Patients During Pregnancy. *J*  
1145 *Crohns Colitis* **13**, 230-244, doi:10.1093/ecco-jcc/jjy147 (2019).
- 1146 50 Libregts, S. F. *et al.* Chronic IFN- $\gamma$  production in mice induces anemia by  
1147 reducing erythrocyte life span and inhibiting erythropoiesis through an IRF-  
1148 1/PU.1 axis. *Blood* **118**, 2578-2588, doi:10.1182/blood-2010-10-315218  
1149 (2011).
- 1150 51 de Bruin, A. M., Voermans, C. & Nolte, M. A. Impact of interferon- $\gamma$  on  
1151 hematopoiesis. *Blood* **124**, 2479-2486, doi:10.1182/blood-2014-04-568451  
1152 (2014).
- 1153 52 Zhang, J. *et al.* Rats offer a superior model of human stress erythropoiesis.  
1154 *Experimental Hematology*, doi:<https://doi.org/10.1016/j.exphem.2019.09.021>  
1155 (2019).
- 1156 53 Dev, A. *et al.* During EPO or anemia challenge, erythroid progenitor cells  
1157 transit through a selectively expandable proerythroblast pool. *Blood* **116**,  
1158 5334-5346, doi:10.1182/blood-2009-12-258947 (2010).
- 1159 54 Lewis, S. M., Williams, A. & Eisenbarth, S. C. Structure and function of the  
1160 immune system in the spleen. *Sci Immunol* **4**, eaau6085,  
1161 doi:10.1126/sciimmunol.aau6085 (2019).
- 1162 55 Grzywa, T. M., Justyniarska, M., Nowis, D. & Golab, J. Tumor Immune  
1163 Evasion Induced by Dysregulation of Erythroid Progenitor Cells Development.  
1164 *Cancers (Basel)* **13**, doi:10.3390/cancers13040870 (2021).
- 1165 56 Srikanthia, S. G., Prasad, J. S., Bhaskaram, C. & Krishnamachari, K. A.  
1166 Anaemia and immune response. *Lancet (London, England)* **1**, 1307-1309,  
1167 doi:10.1016/s0140-6736(76)92647-7 (1976).

- 1168 57 Aly, S. S., Fayed, H. M., Ismail, A. M. & Abdel Hakeem, G. L. Assessment of  
1169 peripheral blood lymphocyte subsets in children with iron deficiency anemia.  
1170 *BMC Pediatrics* **18**, 49, doi:10.1186/s12887-018-0990-5 (2018).
- 1171 58 Pasricha, S.-R., Colman, K., Centeno-Tablante, E., Garcia-Casal, M.-N. &  
1172 Peña-Rosas, J.-P. Revisiting WHO haemoglobin thresholds to define anaemia  
1173 in clinical medicine and public health. *The Lancet Haematology* **5**, e60-e62,  
1174 doi:[https://doi.org/10.1016/S2352-3026\(18\)30004-8](https://doi.org/10.1016/S2352-3026(18)30004-8) (2018).
- 1175 59 Reese, T. A. *et al.* Chitin induces accumulation in tissue of innate immune  
1176 cells associated with allergy. *Nature* **447**, 92-96, doi:10.1038/nature05746  
1177 (2007).
- 1178 60 Hogquist, K. A. *et al.* T cell receptor antagonist peptides induce positive  
1179 selection. *Cell* **76**, 17-27, doi:10.1016/0092-8674(94)90169-4 (1994).
- 1180 61 O'Connell, K. E. *et al.* Practical murine hematopathology: a comparative  
1181 review and implications for research. *Comp Med* **65**, 96-113 (2015).
- 1182 62 Edgar, R. C. MUSCLE: multiple sequence alignment with high accuracy and  
1183 high throughput. *Nucleic Acids Res* **32**, 1792-1797, doi:10.1093/nar/gkh340  
1184 (2004).
- 1185 63 Webb, B. & Sali, A. Comparative Protein Structure Modeling Using  
1186 MODELLER. *Curr Protoc Bioinformatics* **54**, 5 6 1-5 6 37, doi:10.1002/cpbi.3  
1187 (2016).
- 1188 64 Williams, C. J. *et al.* MolProbity: More and better reference data for improved  
1189 all-atom structure validation. *Protein Sci* **27**, 293-315, doi:10.1002/pro.3330  
1190 (2018).
- 1191 65 Jones, G., Willett, P., Glen, R. C., Leach, A. R. & Taylor, R. Development and  
1192 validation of a genetic algorithm for flexible docking. *J Mol Biol* **267**, 727-748,  
1193 doi:10.1006/jmbi.1996.0897 (1997).
- 1194 66 Jain, A. N. Surflex: fully automatic flexible molecular docking using a molecular  
1195 similarity-based search engine. *Journal of medicinal chemistry* **46**, 499-511,  
1196 doi:10.1021/jm020406h (2003).
- 1197 67 Pronk, S. *et al.* GROMACS 4.5: a high-throughput and highly parallel open  
1198 source molecular simulation toolkit. *Bioinformatics* **29**, 845-854,  
1199 doi:10.1093/bioinformatics/btt055 (2013).
- 1200 68 M. Bradbrook, G. *et al.* X-Ray and molecular dynamics studies of  
1201 concanavalin-A glucoside and mannoside complexes Relating structure to  
1202 thermodynamics of binding. *Journal of the Chemical Society, Faraday*  
1203 *Transactions* **94**, 1603-1611, doi:10.1039/A800429C (1998).
- 1204 69 Malde, A. K. *et al.* An Automated Force Field Topology Builder (ATB) and  
1205 Repository: Version 1.0. *J Chem Theory Comput* **7**, 4026-4037,  
1206 doi:10.1021/ct200196m (2011).
- 1207 70 Heshusius, S. *et al.* Large-scale in vitro production of red blood cells from  
1208 human peripheral blood mononuclear cells. *Blood Advances* **3**, 3337-3350,  
1209 doi:10.1182/bloodadvances.2019000689 (2019).

1210

## Figures

1211

### 1212 **Figure 1. Anemia induces CECs expansion in the spleen**

1213 **a**, Representative plots of CD71<sup>+</sup>TER119<sup>+</sup> CECs of total live cells in the spleens of  
1214 control, anemic, and 3-days old neonatal mice. **b**, The frequency of CD71<sup>+</sup>TER119<sup>+</sup>  
1215 CECs of total splenocytes in control (n=10), control-IgG (n=7), anemic (NHA, n=13;  
1216 HA-PHZ, n=9; HA-TER119, n=8), and 3-days old neonatal mice (n=5). *P* values were  
1217 calculated with Kruskal-Wallis test with Dunn's post-hoc test. **c**, Numbers of  
1218 CD71<sup>+</sup>TER119<sup>+</sup> CECs in the spleens of control (n=4), anemic (NHA, n=4; HA-PHZ,  
1219 n=4; HA-TER119, n=4), and neonatal (n=4) mice. *P* values were calculated with one-  
1220 way ANOVA with Dunnett's post-hoc test. **d**, Percentages of CD45.2<sup>-</sup> and CD45.2<sup>+</sup>  
1221 cells within CECs (CD71<sup>+</sup>TER119<sup>+</sup>) population (n=5). Representative plot of CD45  
1222 levels in CECs and TER119<sup>-</sup> cells in the spleen of NHA mouse. **e**, Gating strategy for  
1223 CECs developmental stages based on CD44 expression and cells size<sup>16</sup>. **f**,  
1224 Developmental stages of CECs in control mice (n=9), NHA mice (n=13), HA-PHZ  
1225 (n=9), HA-TER119 (n=5), and neonatal mice (n=5). **g**, Representative plot of CD71  
1226 and CD45 levels in CECs in the spleen of NHA mouse and analysis of developmental  
1227 stages of CD45<sup>+</sup> CECs and CD45<sup>-</sup> CECs. **h**, Percentages of CD45<sup>+</sup> CECs in different  
1228 developmental stages in the spleens of NHA mice (n=5). Histograms show the  
1229 fluorescence of CD45 – BV711. Red blood cells (RBCs) are presented as a negative  
1230 control. **i**, Percentages of nucleated CECs (Hoechst 33342<sup>+</sup>) in different  
1231 developmental stages in the spleens of NHA mice (n=5). Histograms show the  
1232 fluorescence of Hoechst 33342 – INDO-1. Red blood cells (RBCs) are presented as  
1233 a negative control. Data show means ± SD. Each point in **b-d,h,i** represents data  
1234 from individual mice. *n* values are the numbers of mice used to obtain the data. The  
1235 source data underlying Fig.1b-d,f,h,i are provided as a Supplementary Data file.

1236

1237 **Figure 2. Anemic mice have impaired T-cell immune response**

1238 **a**, Schematic presentation of the experimental setting. T-cells isolated from OT-I mice  
1239 were labeled with CellTraceViolet (CTV) and adoptively transferred to anemic and  
1240 healthy control mice and stimulated with OVA. **b**, Percentage of proliferating (CTV<sup>low</sup>)  
1241 OT-I T-cells in the spleen of NHA mice (n=8), HA-PHZ mice (n=8), and healthy  
1242 controls (n=5). Histograms show the fluorescence of CTV (CellTraceViolet) – V450 of  
1243 OT-I T-cells. *P* values were calculated with one-way ANOVA with Tukey's post-hoc  
1244 test. **c**, Representative plot of CD71 and TER119 levels in isolated CECs. Additional  
1245 plots are presented in Supplementary Fig. 4. **d**, Proliferation triggered by  
1246  $\alpha$ CD3/ $\alpha$ CD28 in CTV-labelled CD4<sup>+</sup> T-cells co-cultured with CECs isolated from the  
1247 spleens of NHA (n=8), HA-PHZ (n=8), or HA-TER119 (n=4) mice. T-cell:CECs ratio  
1248 was 1:2. Representative proliferation histograms of  $\alpha$ CD3/ $\alpha$ CD28-stimulated CD4<sup>+</sup> T-  
1249 cells co-cultured with CECs. Histograms show the fluorescence of CTV  
1250 (CellTraceViolet) – V450. *P* values were calculated with one-way ANOVA with  
1251 Dunnet's post-hoc test. Data show means  $\pm$  SD. Each point in **b,d** represents data  
1252 from individual mice. *n* values are the numbers of mice. The source data underlying  
1253 Fig. 2b,d are provided as a Supplementary Data file.

1254

1255 **Figure 3. CECs from anemic mice express ARG2 and have high levels of ROS**

1256 **a**, Mean Fluorescence Intensity (MFI) of CellROX Green – FITC in CECs  
1257 (CD71<sup>+</sup>TER119<sup>+</sup>) and RBCs (CD71<sup>-</sup>TER119<sup>+</sup>) of control (n=6), NHA (n=6), and HA-  
1258 PHZ (n=6) mice. Histograms show representative fluorescence of CellROX Green –  
1259 FITC in CECs and RBCs from the spleens of the NHA mouse. *P* values were

1260 calculated with unpaired *t*-test. **b**, Mean Fluorescence Intensity (MFI) of CellROX  
1261 Green – FITC in CECs (CD71<sup>+</sup>TER119<sup>+</sup>), CD45<sup>+</sup> CECs (CD45<sup>+</sup>CD71<sup>+</sup>TER119<sup>+</sup>),  
1262 leukocytes (CD45<sup>+</sup>TER119<sup>-</sup>), T-cells (CD45<sup>+</sup>CD3e<sup>+</sup>), and myeloid cells  
1263 (CD45<sup>+</sup>CD11b<sup>+</sup>) (n=18). *P* values were calculated with Friedman's test with Dunn's  
1264 post-hoc test. **c**, Percentages of ARG2<sup>+</sup> CECs in control mice (n=11), anemic mice  
1265 (NHA, n=5; HA-PHZ, n=11; HA-TER119, n=11), neonatal mice (n=5), and isotype  
1266 control-IgG-treated mice (control-IgG, n=7) based on intracellular staining. **d**, Mean  
1267 Fluorescence Intensity (MFI) of ARG2-APC in CECs from control mice, anemic mice  
1268 (NHA, HA-PHZ, HA-TER119), neonatal mice, and isotype control-IgG-treated mice  
1269 (each group n=5). Histograms show the representative fluorescence of ARG2 – APC  
1270 in CECs in different groups and in anti-ARG2-unstained controls. **e**, Percentages of  
1271 ARG1<sup>+</sup> CECs based on intracellular staining (n=5). *P* values were calculated with  
1272 one-way ANOVA with Dunnet's post-hoc test and with an unpaired *t*-test for HA-  
1273 TER119. **f**, Percentages of YFP<sup>+</sup> CECs in reporter B6.129S4-Arg1<sup>tm1Lky</sup>/J mice  
1274 (controls n=4, NHA n=8, HA-PHZ n=8, neonatal n=5, control-IgG n=4, HA-TER119  
1275 n=8). *P* values were calculated with one-way ANOVA with Dunnet's post-hoc test and  
1276 with an unpaired *t*-test for HA-TER119. **g**, Mean Fluorescence Intensity (MFI) of YFP  
1277 – FITC in CECs of reporter B6.129S4-Arg1<sup>tm1Lky</sup>/J mice in control mice (n=4), anemic  
1278 (NHA n=8, HA-PHZ n=4, HA-TER119 n=8), neonatal mice (n=5) and isotype control-  
1279 IgG-treated mice (n=4). *P* values were calculated with one-way ANOVA with  
1280 Dunnet's post-hoc test. **h**, Representative fluorescence of ARG1 – YFP in CECs in  
1281 reporter B6.129S4-Arg1<sup>tm1Lky</sup>/J control mice and anemic mice (NHA, HA-PHZ).  
1282 Background fluorescence of YFP in CECs from wild-type C57Bl/6 mice presented as  
1283 a negative YFP control. **i,j**, Total arginase activity in CECs lysates (**i**, n=8) or in the  
1284 supernatants from CECs cultures (**j**, n=8). *P* values were calculated with one-way



1285 ANOVA with unpaired *t*-test. **k,l**, Percentages of ARG1<sup>+</sup> CECs (**k**) isolated from the  
1286 spleens of B6.129S4-Arg1<sup>tm1Lky</sup>/J incubated with diluent or PHZ (100 μM for 24h)  
1287 (n=3) and representative fluorescence of ARG1 – YFP (**l**). *P* values were calculated  
1288 with unpaired *t*-test. Data show means ± SD. Each point in **a-g, i-k** represents data  
1289 from individual mice. *n* values are the numbers of mice used to obtain the data. The  
1290 source data underlying Fig. 3a-g, i-k are provided as a Supplementary Data file.

1291

1292 **Figure 4. Phenylhydrazine targets arginase, inhibits its activity, and induces**  
1293 **oxidative damage**

1294 **a**, Inhibition curves for recombinant human ARG1 and ARG2, and IC<sub>50</sub> values for  
1295 PHZ (n=2) and 2(S)-amino-6-boronohexanoic acid (ABH). **b**, NO production from  
1296 CECs and whole splenocytes population isolated from NHA (n=4) and HA-PHZ (n=4)  
1297 mice. *P*-values were calculated with an unpaired *t*-test. **c**, The electrostatic surface  
1298 potential of the human ARG1. The potential was calculated with APBS and projected  
1299 onto the molecular surface of the protein. The figure was prepared with UCSF  
1300 Chimera. **d**, Carbonylation of ARG1 in the presence of PHZ (n=3). Representative  
1301 blot (left) and densitometric analysis done with ImageJ software (right). The negative  
1302 lane represents ARG1 precipitates treated with 2N HCl alone. *P*-values were  
1303 calculated with Ordinary one-way ANOVA with Dunnett's multiple comparisons test.  
1304 Data show means ± SD. Each point in **b** represents data from individual mice. *n*  
1305 values are the numbers of mice used to obtain the data or the number of biological  
1306 replicates of *in vitro* experiments. The source data underlying Fig.4a, 4b, 4d are  
1307 provided as a Supplementary Data file.

1308

1309 **Figure 5. CECs degrade L-Arg and produce ROS leading to the suppression of**  
1310 **T-cells**

1311 **a**, Proliferation and surface markers in  $\alpha$ CD3/ $\alpha$ CD28-stimulated CD4<sup>+</sup> T-cells co-  
1312 cultured with CECs isolated from NHA mice (n=4) at a ratio 1:2 (T-cells:CECs). *P*-  
1313 value was calculated with an unpaired t-test. **b**, Effects of ARGi (OAT-1746, 500 nM)  
1314 and ROSi (N-acetylcysteine, 100  $\mu$ M) on the proliferation of  $\alpha$ CD3/ $\alpha$ CD28-stimulated  
1315 CD4<sup>+</sup> T-cells co-cultured with CECs isolated from the spleens of NHA mice (n=4) at a  
1316 ratio 1:2 (T-cells:CECs). Representative proliferation histograms of  $\alpha$ CD3/ $\alpha$ CD28-  
1317 stimulated CD4<sup>+</sup> T-cells co-cultured with CECs in the presence of ARGi or ROSi.  
1318 Histograms show the fluorescence of CTV (CellTraceViolet) – V450. *P*-value was  
1319 calculated with one-way ANOVA with Bonferroni's post-hoc test. **c**, Effects of L-  
1320 arginine supplementation (1000  $\mu$ M) or ARGi (OAT-1746, 500 nM) on the  
1321 proliferation of  $\alpha$ CD3/ $\alpha$ CD28-stimulated CD4<sup>+</sup> T-cells cultured in full medium or in  
1322 CECs-conditioned medium (CM) (n=3). *P*-value was calculated with one-way ANOVA  
1323 with Bonferroni's post-hoc test. **d**, Proliferation of  $\alpha$ CD3/ $\alpha$ CD28-stimulated CD4<sup>+</sup> T-  
1324 cells co-cultured with total CECs population or with nucleated CECs (nCECs) isolated  
1325 using density-gradient centrifugation from NHA mice (n=5) at a ratio 1:2 (T-  
1326 cells:CECs). Histograms show the fluorescence of CTV (CellTraceViolet) – V450. *P*-  
1327 value was calculated with repeated measures ANOVA with Holm-Sidak's post-hoc  
1328 test. **e,f**, Proliferation of  $\alpha$ CD3/ $\alpha$ CD28-stimulated CD4<sup>+</sup> T-cells (**e**) or CD8<sup>+</sup> T-cells (**f**)  
1329 co-cultured with CECs isolated from NHA mice (n=4) at a ratio 1:10 (T-cells:CECs).  
1330 *P*-value was calculated with paired t-test. **g**, Arginase activity of the splenocytes  
1331 lysate of control and anemic mice calculated per  $\mu$ g of total protein based on  
1332 bicinchoninic acid (BCA) protein assay. *P*-value was calculated with an unpaired t-  
1333 test. **h**, The level of ARG1 and ARG2 in the splenocytes lysate of control (n=4) and

1334 anemic mice (n=4).  $\beta$ -actin showed as a loading control. **i,j** Relative density of ARG1  
1335 (**i**) and ARG2 (**j**) compared to  $\beta$ -actin. *P*-value was calculated with an unpaired t-test.  
1336 **k,l**, The level of CD3 $\zeta$  in CD4<sup>+</sup> (**k**) and CD8<sup>+</sup> (**l**) T-cells in the spleen of control (n=4)  
1337 and anemic mice (n=4) based on intracellular staining. *P*-value was calculated with  
1338 an unpaired t-test. **m,n**, The levels of CD3 $\zeta$  in CD4<sup>+</sup> (**m**) and CD8<sup>+</sup> (**n**)  $\alpha$ CD3/ $\alpha$ CD28-  
1339 stimulated T-cells in the presence of CECs isolated from NHA mice (n=4) based on  
1340 intracellular staining. *P*-value was calculated with one-way ANOVA with Bonferroni's  
1341 post-hoc test. Data show means  $\pm$  SEM (a-f, m,n) or means  $\pm$  SD (h,i-l). Each point in  
1342 **a-g, i-n** represents data from individual mice. *n* values are the numbers of mice used  
1343 to obtain the data or the number of biological replicates in *in vitro* experiments. The  
1344 source data underlying Fig. 5a-n are provided as a Supplementary Data file.

1345

1346 **Figure 6. CECs from *Arg2*<sup>-/-</sup> mice have impaired immunoregulatory properties**

1347 **a**, The levels of CD3 $\zeta$  in spleen CD4<sup>+</sup> (**a**) and CD8<sup>+</sup> (**b**) T-cells in control (n=4) and  
1348 anemic mice (n=4) based on intracellular staining. Histograms show the fluorescence  
1349 of CD3 $\zeta$  – FITC in CD4<sup>+</sup> (**a**) and CD8<sup>+</sup> (**b**) T-cells. *P*-values were calculated with one-  
1350 way ANOVA with Tukey's post-hoc test. **c**, Proliferation of  $\alpha$ CD3/ $\alpha$ CD28-stimulated  
1351 CD4<sup>+</sup> T-cells co-cultured with CECs isolated from NHA *Arg2*<sup>-/-</sup> mice or NHA wild-type  
1352 *Arg2*<sup>+/+</sup> mice at a 1:4 ratio (T-cells:CECs). Representative proliferation histograms of  
1353  $\alpha$ CD3/ $\alpha$ CD28-stimulated CD4<sup>+</sup> T-cells co-cultured with CECs isolated from *Arg2*<sup>-/-</sup>  
1354 mice or wild-type *Arg2*<sup>+/+</sup> mice in the presence of ARGi or ROSi. Histograms show  
1355 the fluorescence of CTV (CellTraceViolet) – V450. *P*-values were calculated with  
1356 one-way ANOVA with Bonferroni's post-hoc test. Data show means  $\pm$  SD (**a,b**) or  
1357 means  $\pm$  SEM (**c**). Each point in **a-c** represents data from individual mice. *n* values  
1358 are the numbers of mice used to obtain the data or the number of biological

1359 replicates in *in vitro* experiments. The source data underlying Fig. 6a-c are provided  
1360 as a Supplementary Data file.

1361

1362 **Figure 7. CECs expand in the blood of anemic patients and suppress T-cells**  
1363 **response**

1364 **a**, Percentages of live CD71<sup>+</sup>CD235a<sup>+</sup> CECs in the whole blood of non-anemic  
1365 (controls, n=42) and anemic patients (n=41). *P*-value was calculated with the Mann-  
1366 Whitney test. **b**, Representative dot plots of CECs in the blood of non-anemic and  
1367 anemic patients. **c**, CECs count per  $\mu$ l of blood in controls (n=42) and anemic  
1368 patients (n=41). *P*-value was calculated with the Mann-Whitney test. **d**, Correlation of  
1369 the number of CECs per  $\mu$ l of blood and hemoglobin concentration (n=82). The  
1370 correlation was calculated with Spearman *r*. **e**, CECs count per  $\mu$ l of blood in non-  
1371 anemic controls (n=42) and patients with mild (n=7), moderate (n=32), and severe  
1372 (n=2) anemia. *P*-values were calculated with Kruskal-Wallis test with Dunn's post-hoc  
1373 test. **f,g**, Percentages of CECs in the fraction of peripheral blood mononuclear cells  
1374 (PBMC) in controls (n=12) and anemic patients (n=13) (**f**) and representative dot  
1375 plots of CECs (**g**). *P*-value was calculated with the Mann-Whitney test. **h**, PBMCs of  
1376 controls (n=12) and anemic patients (n=13) were stimulated with  $\alpha$ CD3/ $\alpha$ CD28 for  
1377 12h in the presence of a protein transport inhibitor. IFN- $\gamma$  levels were determined by  
1378 intracellular staining. *P*-values were calculated with an unpaired *t*-test. **i**,  
1379 Representative plots of IFN- $\gamma$  levels in unstimulated or  $\alpha$ CD3/ $\alpha$ CD28-stimulated  
1380 CD3 $\epsilon$ <sup>+</sup> T-cells from PBMCs of anemic patients or non-anemic controls. Isotype  
1381 control-stained cells are shown as a negative control. Data show means  $\pm$  SD. Each  
1382 point in **a,c-f,h** represents data from individual patients. *n* values are the numbers of

1383 patients used to obtain the data or the number of biological replicates in *in vitro*  
1384 experiments. The source data underlying Fig.7a, 7c-f, 7h are provided as a  
1385 Supplementary Data file.

1386

1387 **Figure 8. CECs from human bone marrow express ARG1 and ARG2 and**  
1388 **suppress T-cells proliferation**

1389 **a**, Representative plots of CD71<sup>+</sup> and CD235<sup>+</sup> CECs in the aspirate of human bone  
1390 marrow of total live cells. **b**, Percentages of ARG1<sup>+</sup> and ARG2<sup>+</sup> CECs in the human  
1391 bone marrow based on intracellular staining. **c**, Mean Fluorescence Intensity (MFI) of  
1392 ARG1-PE and ARG2-APC in CECs. **d**, Representative histograms of ARG1 and  
1393 ARG2 levels in CECs from human bone marrow. Fluorescence-minus-one (FMO) is  
1394 shown as unstained controls. **e,f**, Proliferation triggered by  $\alpha$ CD3/ $\alpha$ CD28 of CTV-  
1395 labelled CD4<sup>+</sup> (**e**) and CD8<sup>+</sup> (**f**) T-cells co-cultured with CECs isolated from the  
1396 human bone marrow. T-cell to CECs ratio was 1:2 (n=9). The proliferation of T-cells  
1397 in co-culture with CECs was calculated as a percentage of maximum proliferation  
1398 (100%) of T-cells that was triggered by  $\alpha$ CD3/ $\alpha$ CD28 antibodies and cultured without  
1399 CECs. Representative histograms shows CTV – BV421 fluorescence of CD4<sup>+</sup> (**e**) or  
1400 CD8<sup>+</sup> (**f**) T-cells co-cultured with CECs at a 1:2 ratio in the presence of ARGi (OAT-  
1401 1746, 500 nM). *P*-values were calculated with Friedman's test with Dunn's post-hoc  
1402 test. Data show means  $\pm$  SD (**b,c**) or means  $\pm$  SEM (**e,f**). *n* values are the numbers  
1403 of individual patients used to obtain the data or the number of biological replicates in  
1404 *in vitro* experiments. The source data underlying Fig.8b, 8c, 8e, 8f are provided as a  
1405 Supplementary Data file.

1406

1407 **Figure 9. Erythroleukemia-derived erythroid cell lines suppress T-cells in an**  
1408 **ARG- and ROS-dependent mechanism**

1409 **a**, The levels of CD71 and CD235a in erythroleukemia-derived erythroid cell lines. **b-**  
1410 **d**, Proliferation of CTV-labelled CD4<sup>+</sup> T-cells triggered by  $\alpha$ CD3/ $\alpha$ CD28 co-cultured  
1411 with K562 (**b**), HEL92.1.7 (**c**) and TF-I (**d**) erythroid cell lines at different ratios (T-  
1412 cells:CECs) (n=3). *P*-values were calculated with repeated measures ANOVA with  
1413 Dunnett's post-hoc test. **e**, Representative histograms of CTV – BV421 fluorescence  
1414 of CD4<sup>+</sup> T-cells co-cultured with erythroid cells at a 1:2 ratio in the presence of ARGi  
1415 (OAT-1746, 1.5  $\mu$ M) and ROSi (NAC, 200  $\mu$ M) (n=2). Statistical analyses are  
1416 provided in Supplementary Fig. 18a. **f-h**, Proliferation of CTV-labelled CD8<sup>+</sup> T-cells  
1417 triggered by  $\alpha$ CD3/ $\alpha$ CD28 co-cultured with K562 (**f**), HEL92.1.7 (**g**), or TF-I (**h**)  
1418 erythroid cells at different ratios (n=3). *P*-values were calculated with repeated  
1419 measures ANOVA with Dunnett's post-hoc test. **i**, Representative histograms of CTV  
1420 – BV421 fluorescence of CD8<sup>+</sup> T-cells co-cultured with erythroid cell lines at a 1:2  
1421 ratio in the presence of ARGi (OAT-1746, 1.5  $\mu$ M) and ROSi (NAC, 200  $\mu$ M) (n=2).  
1422 Statistical analyses are provided in Supplementary Fig. 18b. Data show means  $\pm$   
1423 SEM. *n* values are the numbers of biological replicates in *in vitro* experiments. The  
1424 source data underlying Fig.9b-d, 9f-h are provided as a Supplementary Data file.

1425

1426 **Figure 10. Suppression of T-cells is a general feature of erythroid cells that**  
1427 **diminishes with CECs maturation**

1428 **a**, Representative plot of isolated CECs differentiated from PBMCs. **b,c**, Proliferation  
1429 of CTV-labelled CD4<sup>+</sup> (**b**) and CD8<sup>+</sup> (**c**) T-cells triggered by  $\alpha$ CD3/ $\alpha$ CD28 co-cultured  
1430 with CECs differentiated from PBMCs (n=4). *P*-values were calculated with one-way

1431 ANOVA with Dunnett's post-hoc test. **d**, Representative density plots of CECs  
1432 differentiation from PBMCs based on CD71 and CD235a expression. **e**, Proliferation  
1433 of CTV-labelled CD4<sup>+</sup> triggered by  $\alpha$ CD3/ $\alpha$ CD28 co-cultured with CECs-PBMCs at  
1434 different developmental stages at 1:4 ratio. **f,g**, Relative proliferation of CD4<sup>+</sup> (**f**) and  
1435 CD8<sup>+</sup> (**g**) T-cells co-cultured with CECs-PBMCs at different time points at a 1:4 ratio.  
1436 *P*-values were calculated with one-way ANOVA with Bonferroni's post-hoc test. **h,i,j**,  
1437 Levels of CD71 (**h**), CD235a (**i**), and CD49d (**j**) during erythroid differentiation from  
1438 PBMCs. Data show means  $\pm$  SD. Each point in **b,c, f-j** represents data from  
1439 individual patients. *n* values are the numbers of individual patients used to obtain the  
1440 data or the number of biological replicates in *in vitro* experiments. The source data  
1441 underlying Fig.10b, 10c, 10f-j are provided as a Supplementary Data file.

1442

1443

Figure 1.

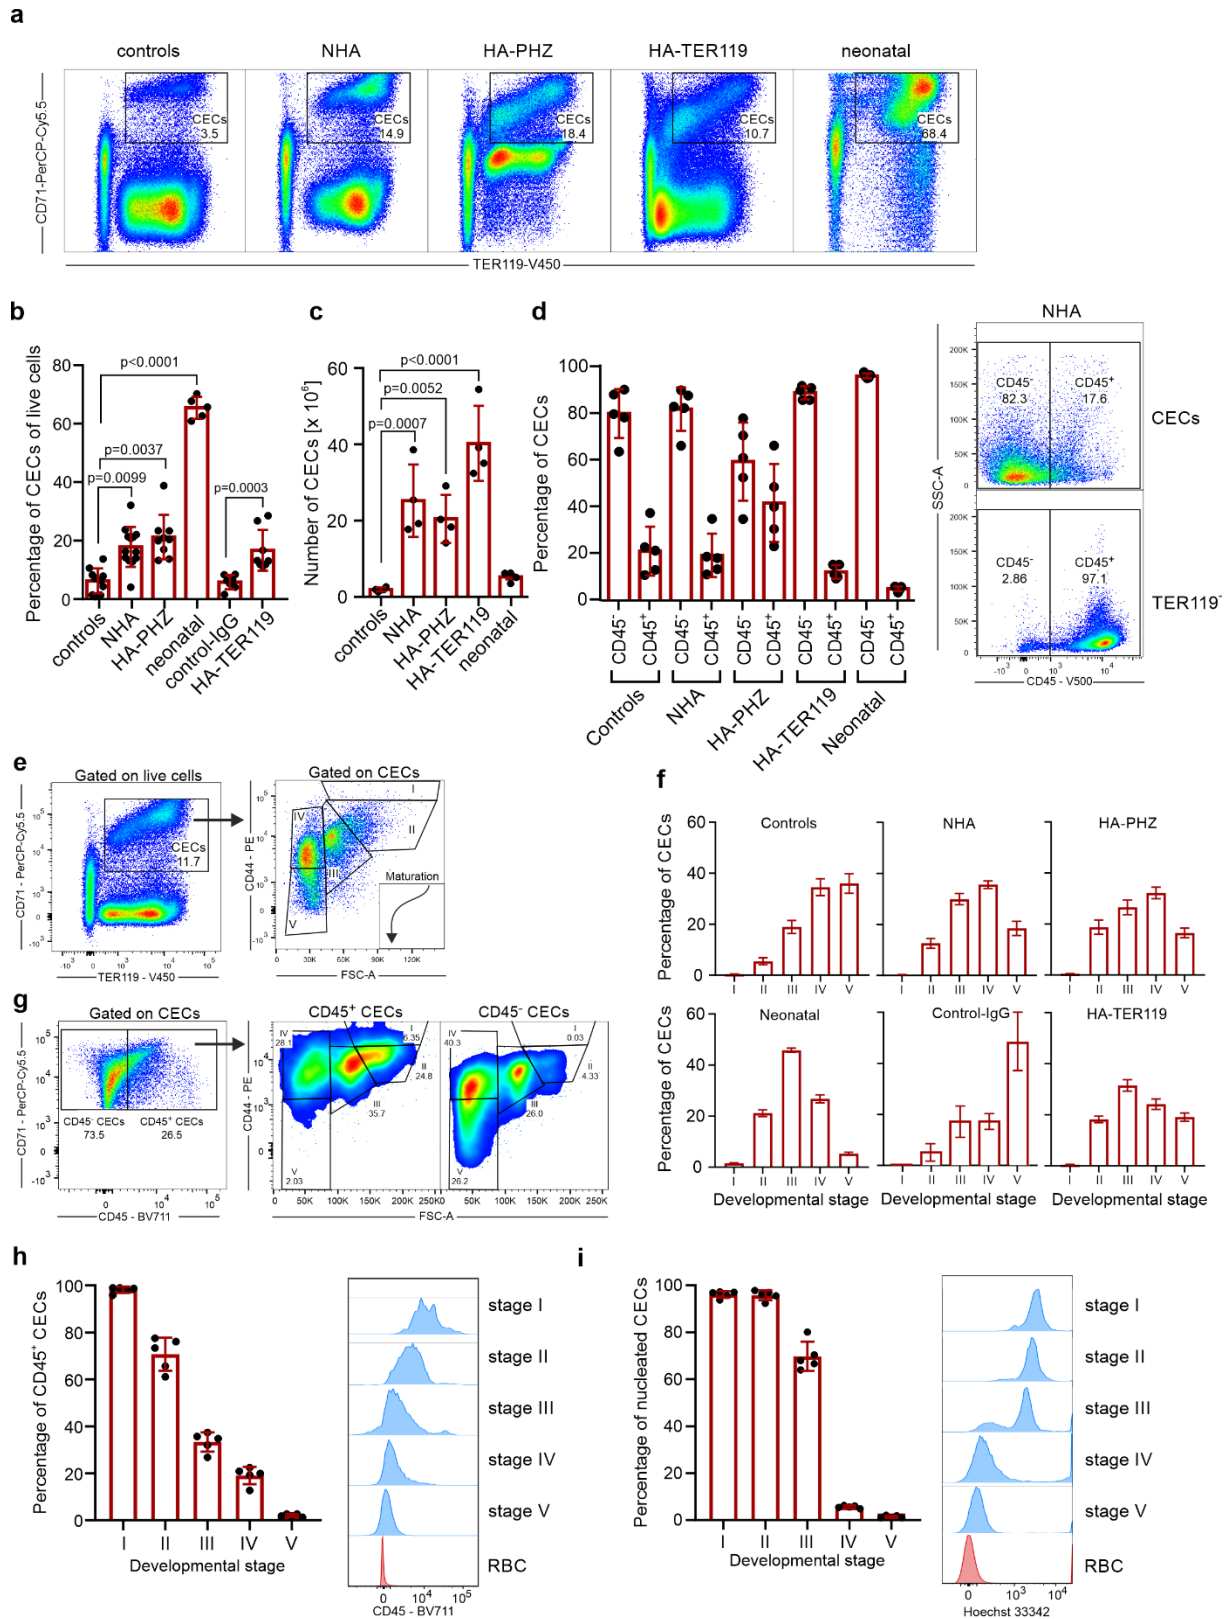

1444

1445



1446

Figure 2.

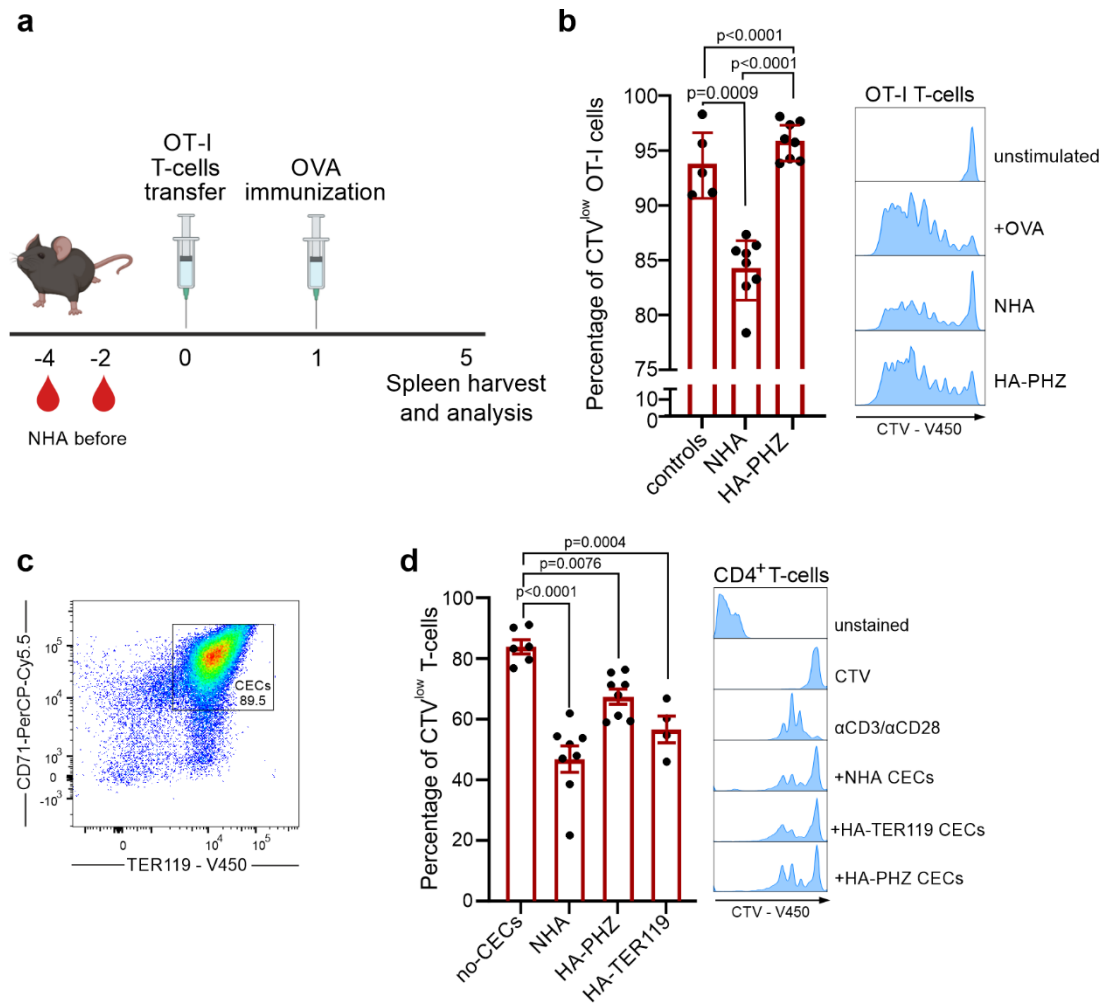

1447

1448

1449

Figure 3.

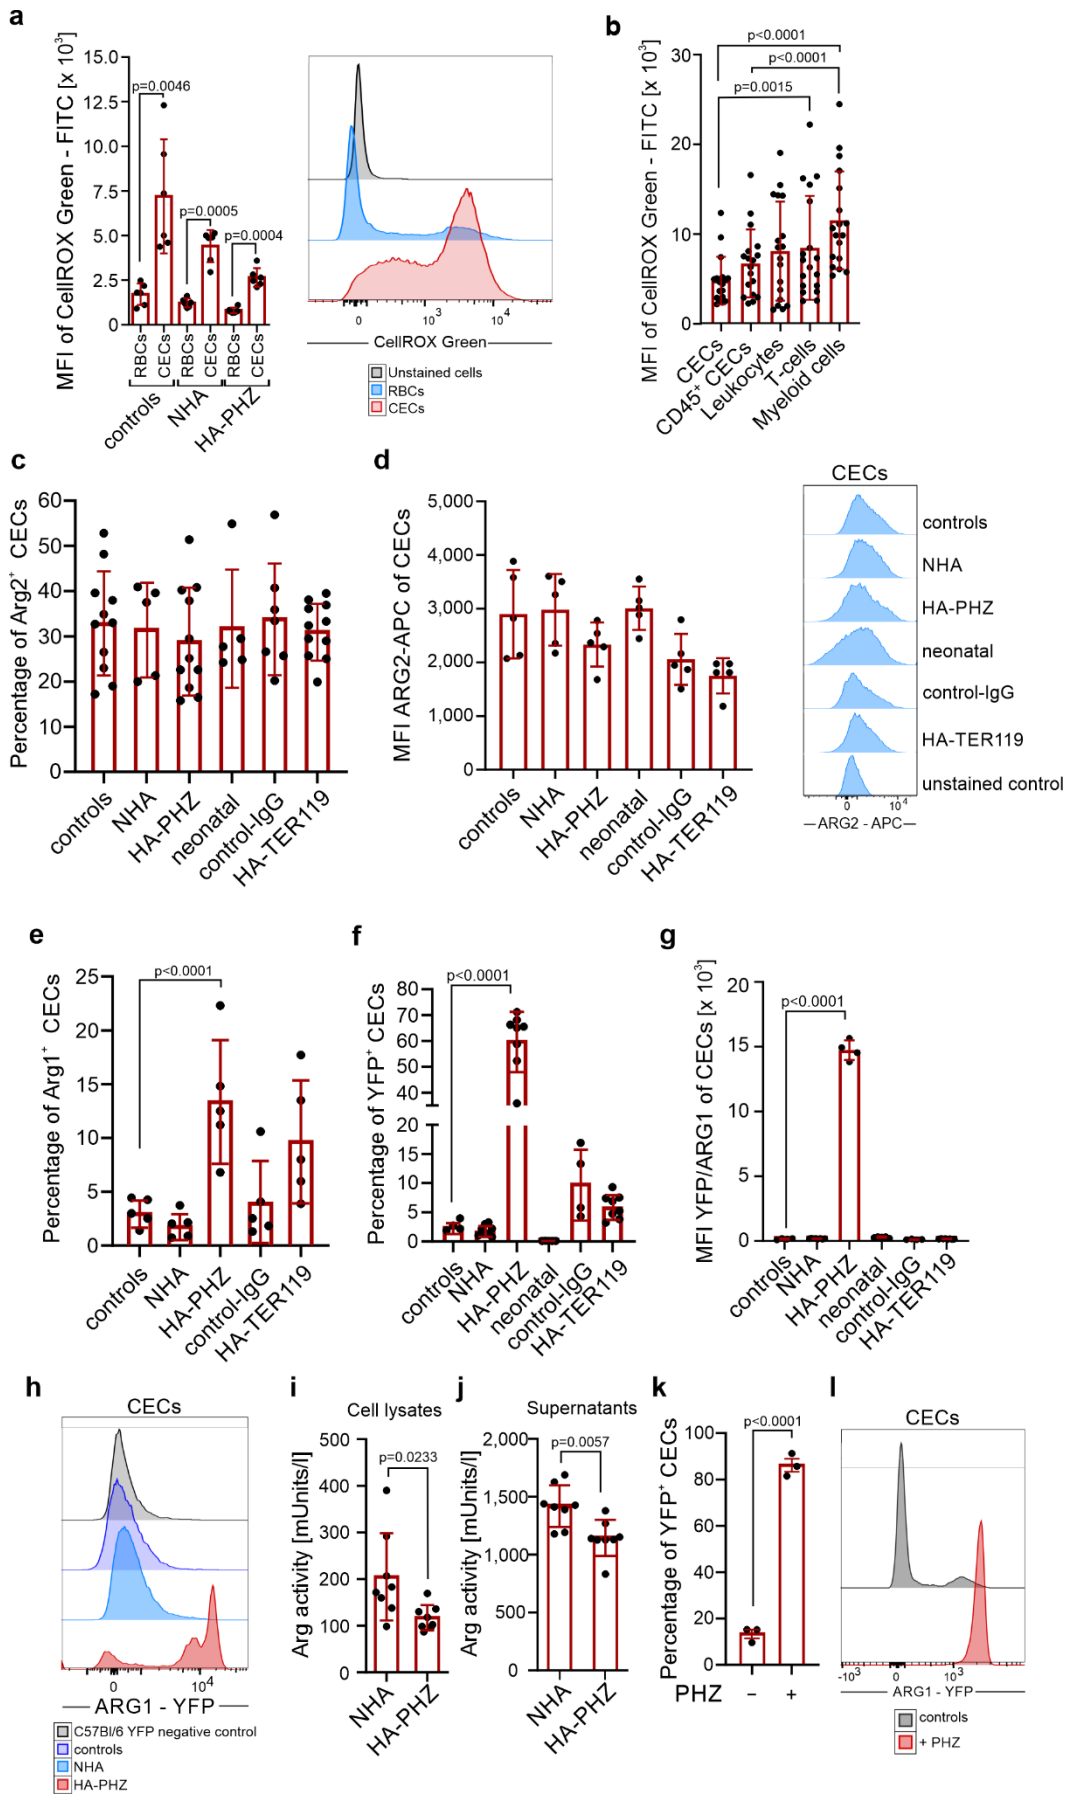

1450

1451

**Figure 4.**

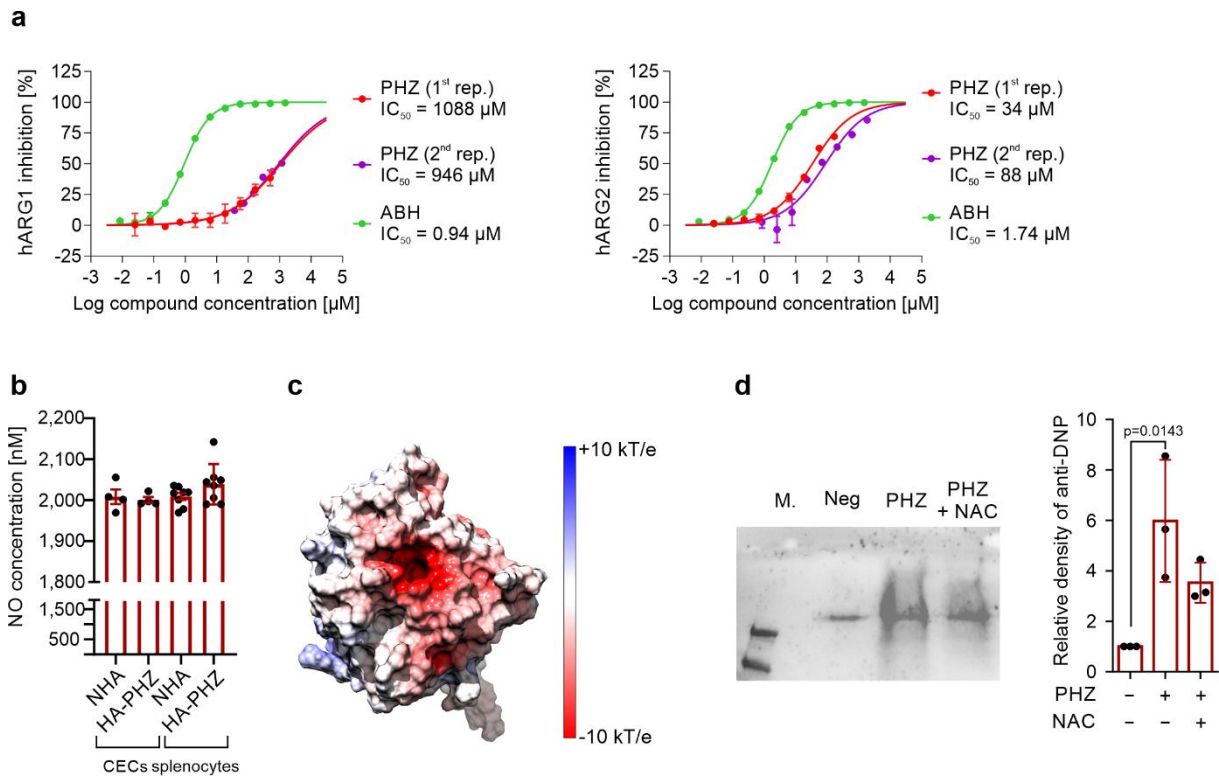

1452

1453

1454

Figure 5.

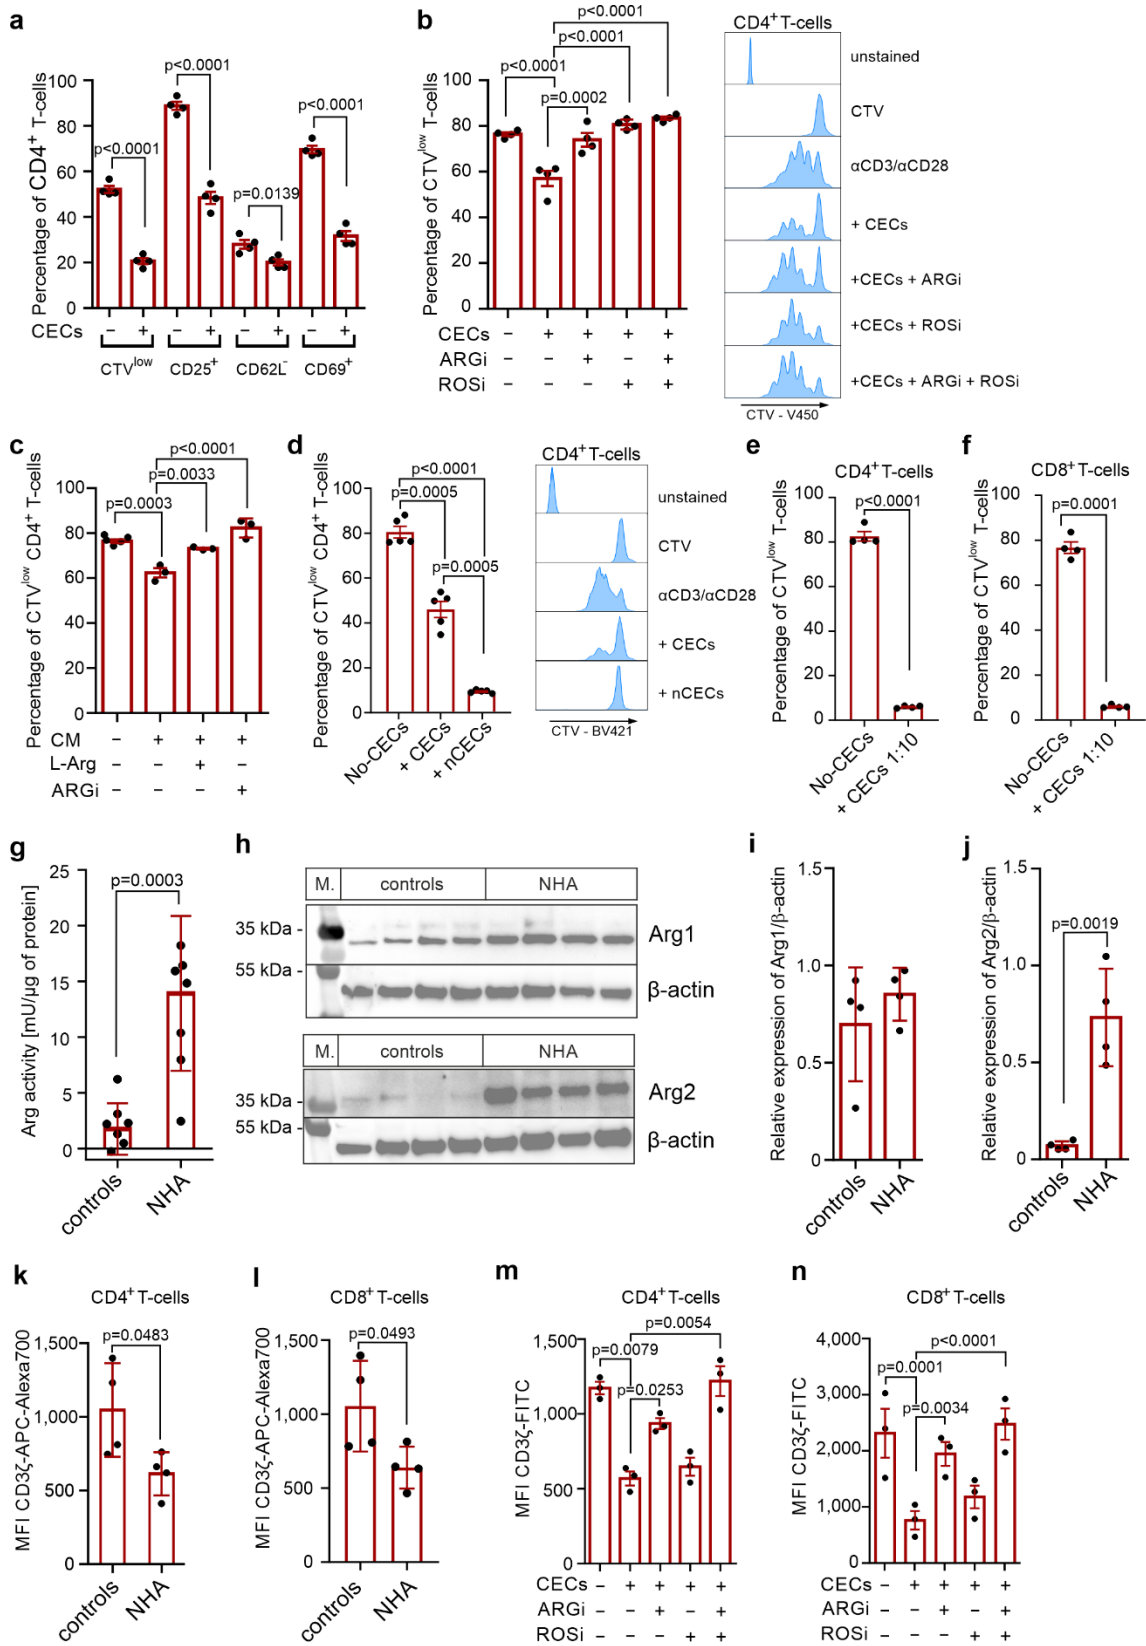

1455

1456

1457

Figure 6.

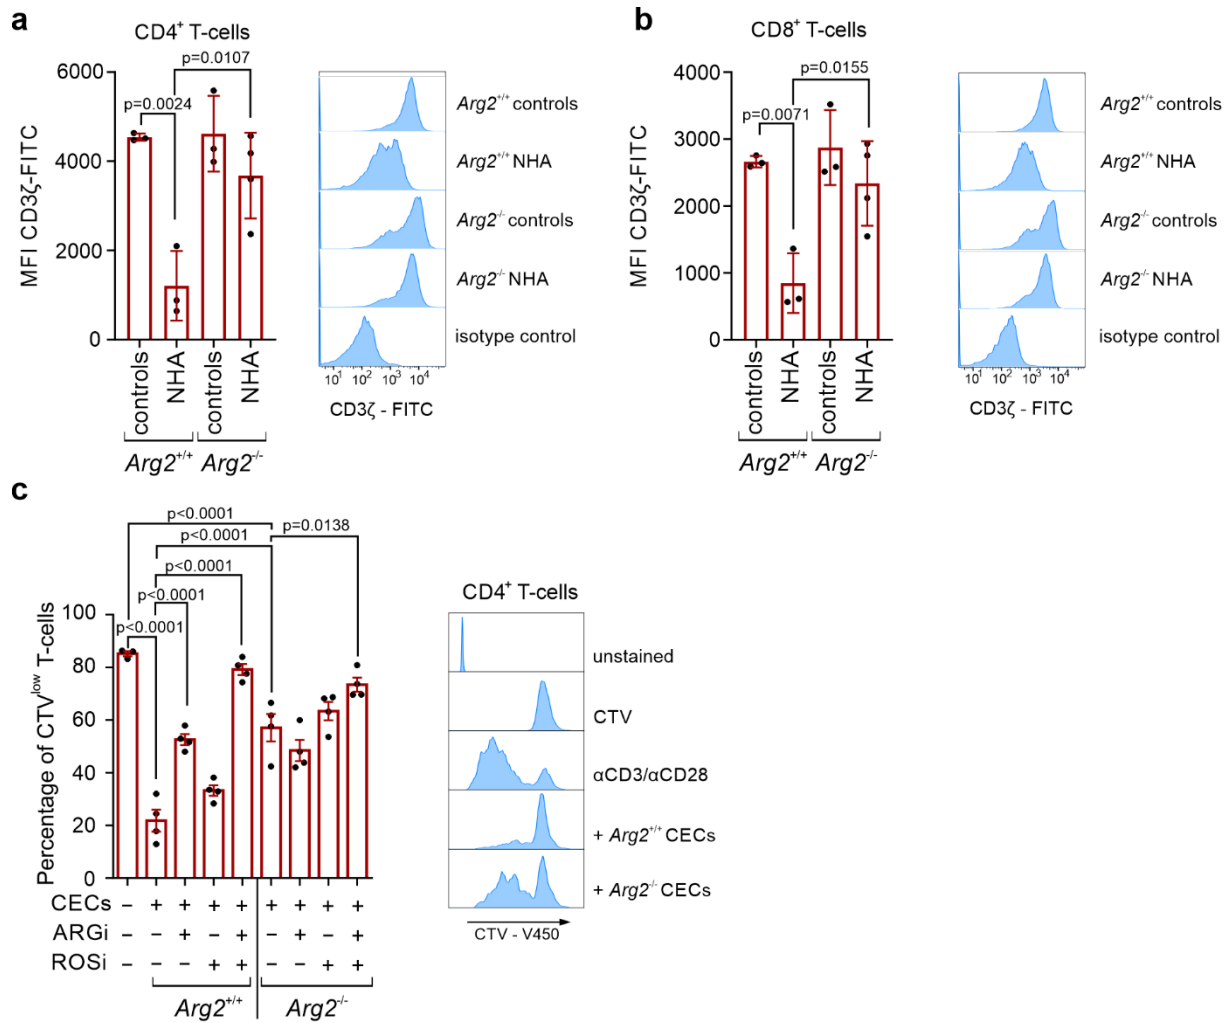

1458

1459

1460

Figure 7.

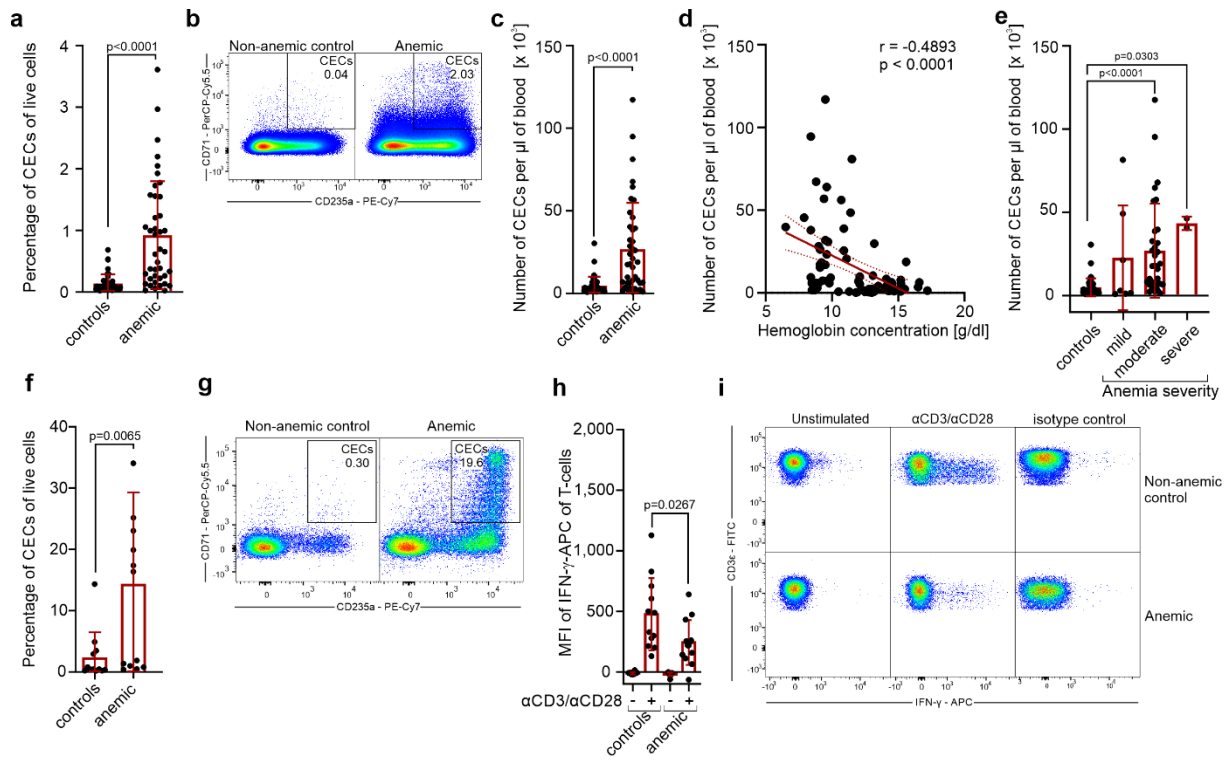

1461

1462

1463

Figure 8.

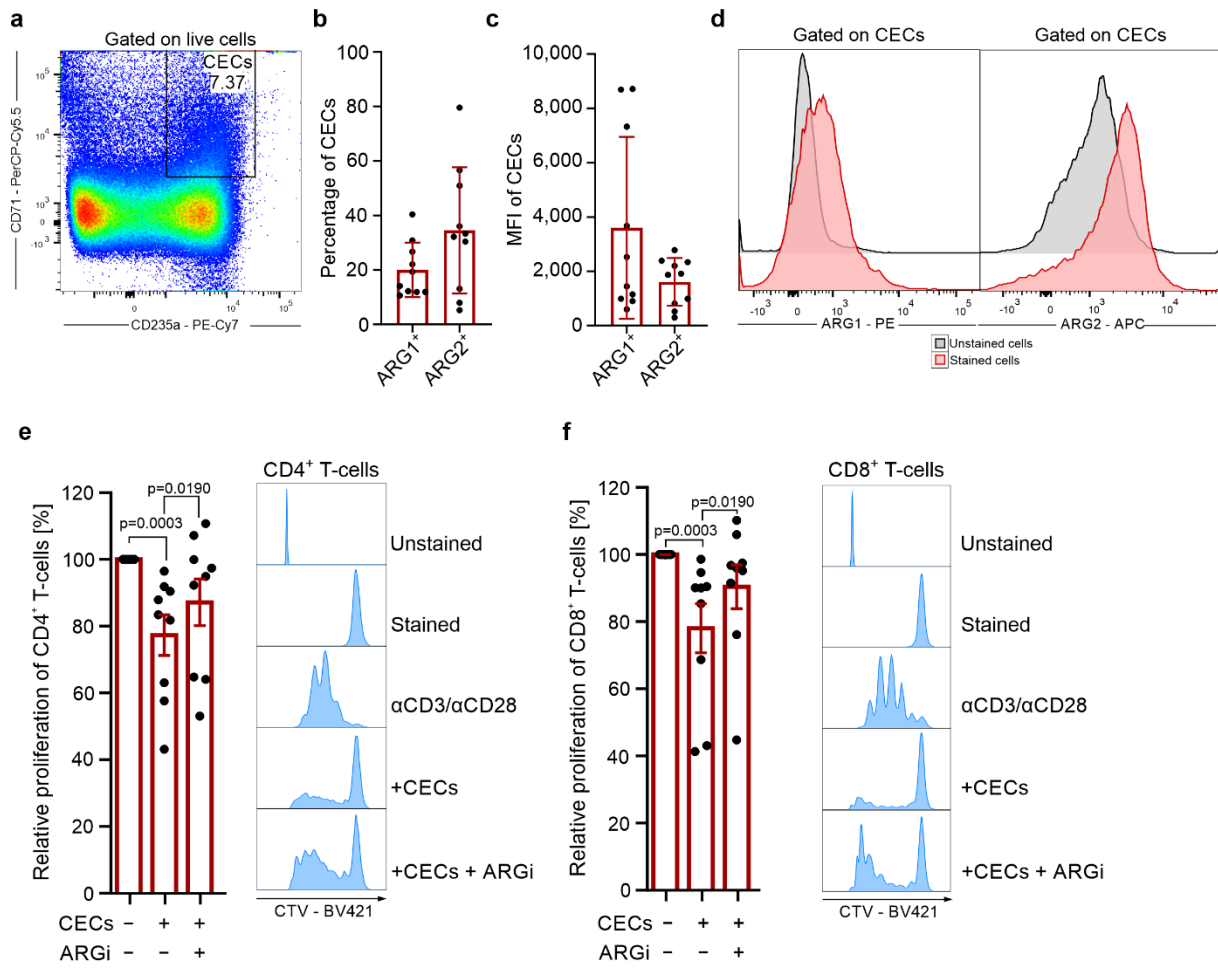

1464

1465

1466

Figure 9.

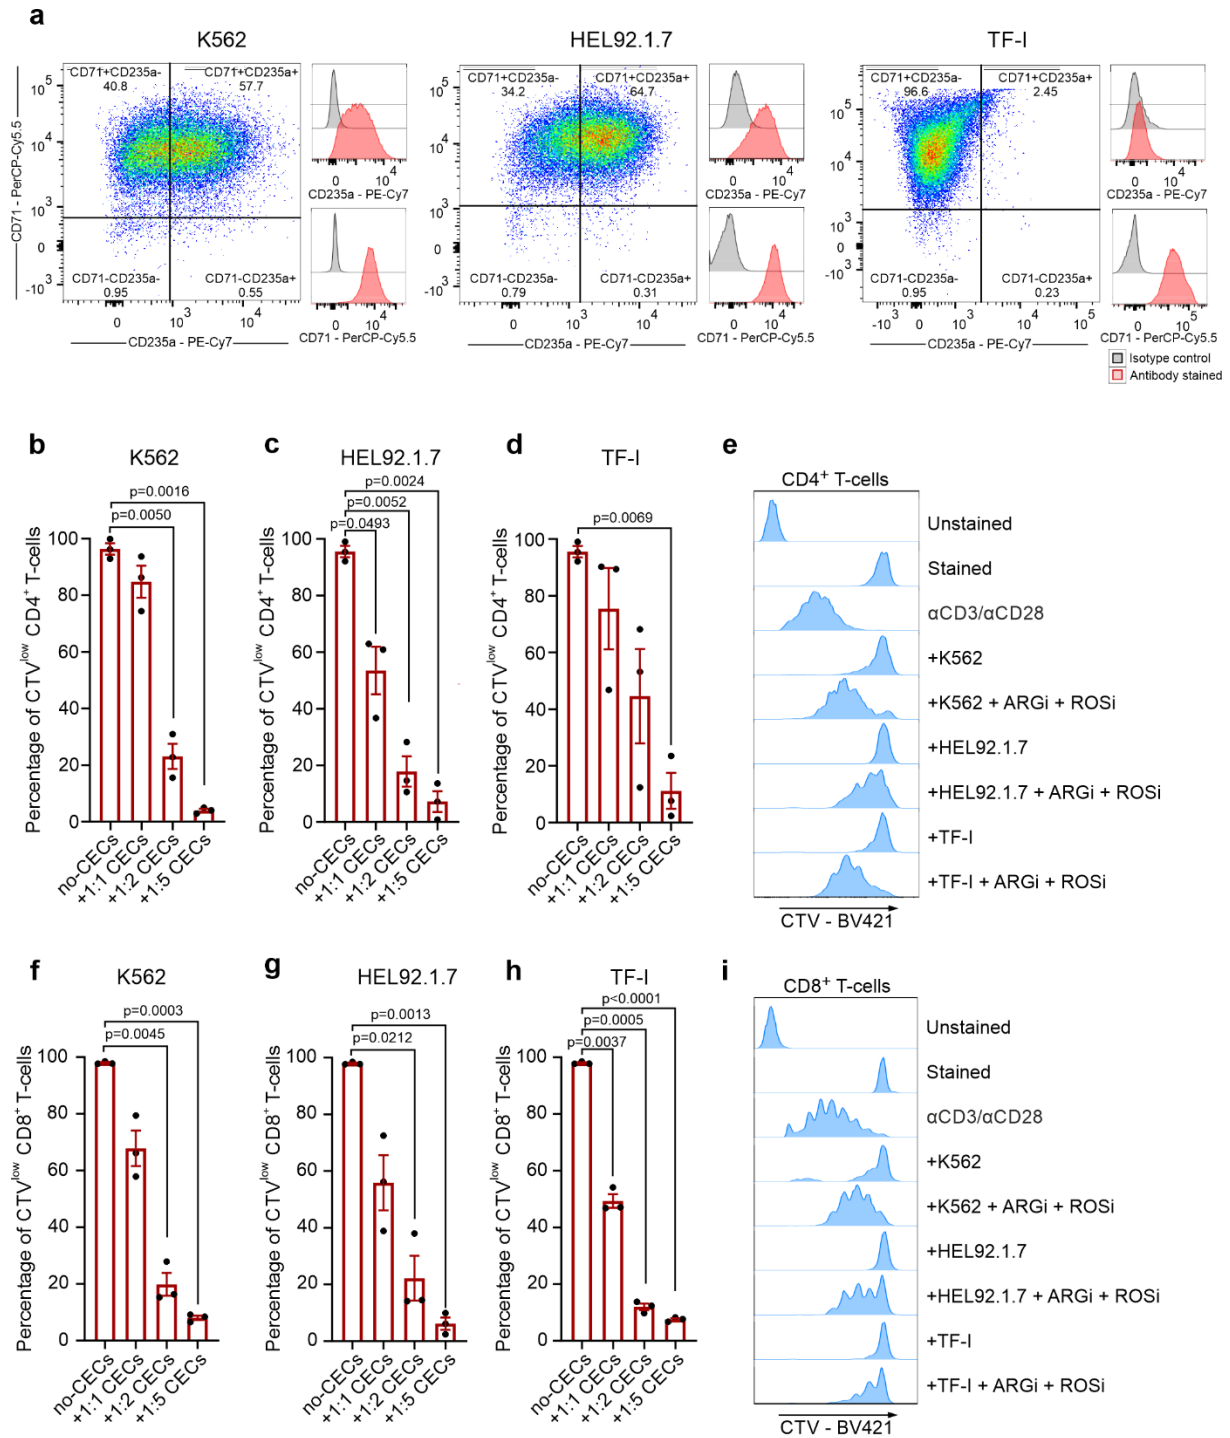

1467

1468



1469

Figure 10.

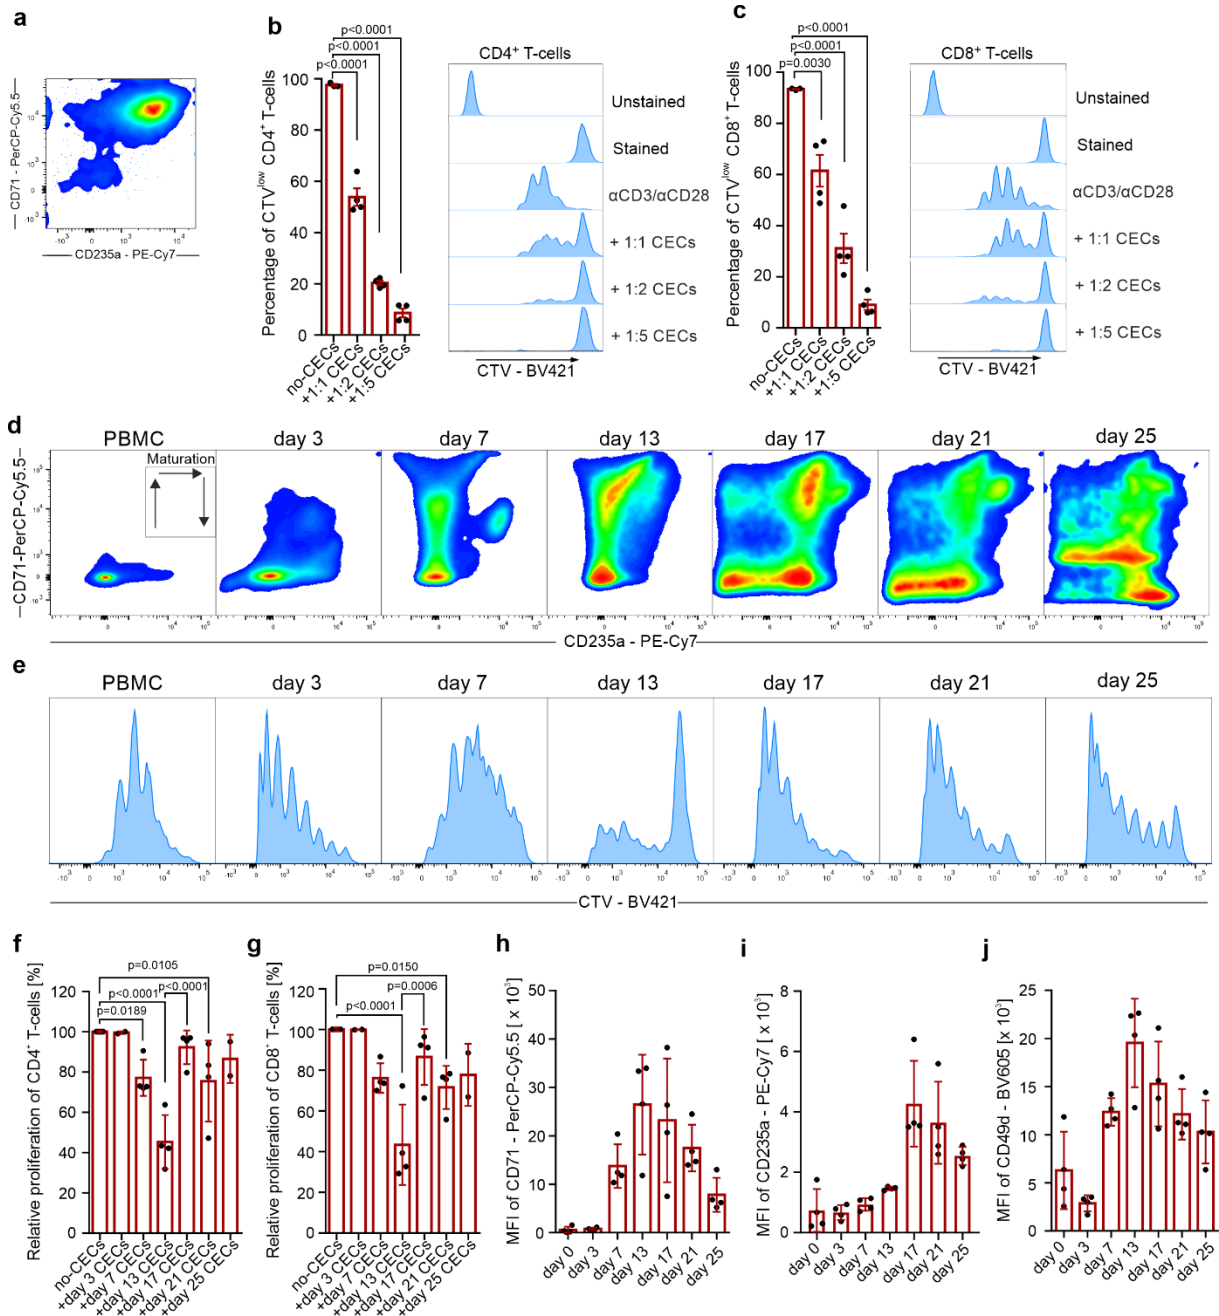

1470

1471

1472
